# Supplementary material for: Tuning the catalytic activity and selectivity of water-soluble bimetallic RuPt nanoparticles by modifying their surface metal distribution
Source: Royal Society of Chemistry journal article supplement (doi:10.1039/c9nr04149d), 2019-01-01
Supplement: c9nr04149d1.pdf [file c9nr04149d1.pdf]

## Supporting Information

### **Tuning the Catalytic Activity and Selectivity of Water-Soluble Bimetallic RuPt Nanoparticles by Modifying their Surface Metal Distribution**

*Donia Bouzouita,<sup>1</sup> Guy Lippens,<sup>2</sup> Edwin A. Baquero,<sup>3</sup> Pier F. Fazzini,<sup>1</sup> Gregory Pieters,<sup>4</sup> Yannick Coppel,<sup>5</sup> Pierre Lecante,<sup>6</sup> Simon Tricard,<sup>1,\*</sup> Luis M. Martínez-Prieto<sup>1,\*</sup> and Bruno Chaudret<sup>1,\*</sup>*

<sup>1</sup> LPCNO, Laboratoire de Physique et Chimie des Nano-Objets, UMR5215 INSA-CNRS UPS, Institut des Sciences appliquées, 135, Avenue de Rangueil, F-31077 Toulouse, France.

<sup>2</sup> LISBP, Université de Toulouse, CNRS, INRA, INSA, UPS 135 avenue de Rangueil, 31077 Toulouse, France.

<sup>3</sup> Departamento de Química, Facultad de Ciencias Universidad Nacional de Colombia, Sede Bogotá Carrera 30 No. 45-03, 111321, Bogotá, Colombia.

<sup>4</sup> SCBM, CEA, Univ. Paris Saclay, F-91191, Gif-sur-Yvette, France.

<sup>5</sup> CNRS, LCC (Laboratoire de Chimie de Coordination), Université de Toulouse, UPS, INPT, 205 route de Narbonne, BP 44099, F-31077-Toulouse Cedex 4, France.

<sup>6</sup> CEMES (Centre d'Elaboration de Matériaux et d'Etudes Structurales), CNRS, 29 Rue J. Marvig, F-31055 Toulouse, France.

## Table of contents

|                                             |     |
|---------------------------------------------|-----|
| <b>S1.</b> Experimental section .....       | S3  |
| <b>S2.</b> HRTEM and SEM-EDX.....           | S7  |
| <b>S3.</b> WAXS .....                       | S10 |
| <b>S4.</b> FT-IR.....                       | S11 |
| <b>S5.</b> MAS NMR.....                     | S15 |
| <b>S6.</b> Catalytic data .....             | S24 |
| <b>S7.</b> Solution NMR.....                | S25 |
| <b>S8.</b> Chemical shift perturbation..... | S29 |

## **S1. Experimental Section**

### **General considerations and starting materials**

All chemical operations were carried out under an argon atmosphere using standard Schlenk, Fisher-Porter reactors and glove-box techniques. Solvents were purified before use: THF and pentane were collected from a MBraun purification system.

Ru(COD)(COT) and Pt(NBE)<sub>3</sub> were purchased from Nanomeps Toulouse, Pt(CH<sub>3</sub>)<sub>2</sub>(COD) from STREM, CO and D<sub>2</sub> gas from Air liquide, <sup>13</sup>C (99.14%) from Eurisotop, L-lysine (98%) and Pt<sub>2</sub>(dba)<sub>3</sub> from Sigma-Aldrich. All reagents were used as received from the commercial sources.

Elemental Analysis were performed by Thermogravimetric analyses (TGA) with a TGA/DSC 1 STAR System equipped with an ultra-microbalance UMX5, a gas switch GC200 and DTA and DSC sensors. The samples were analyzed through a two-step oxidation/reduction method. First the sample was heated from 25 °C to 700 °C at 10 °C/min under air (2h). After cooling down, it was heated again from 25 °C to 900 °C at 30 °C/min under a gas mixture Ar/H<sub>2</sub> 4% (3h).

*Wide-angle X-ray scattering (WAXS).* WAXS was performed at CEMES-CNRS. Samples were sealed in 1.0 mm diameter Lindemann glass capillaries. The samples were irradiated with graphite monochromatized molybdenum K $\alpha$  (0.071069 nm) radiation and the X-ray intensity scattered measurements were performed using a dedicated two-axis diffractometer. Radial distribution functions (RDF) were obtained after Fourier transformation of the reduced intensity functions.

*Nuclear Magnetic Resonance (NMR).* <sup>1</sup>H spectra were recorded on a Bruker Avance 400 MHz spectrometer. NMR tubes were prepared under argon atmosphere and monitored at 55 °C during 16 h for the kinetic experiments.

*Solid state NMR (MAS-NMR).* Solid-state NMR experiments were recorded at the LCC (Toulouse) on a Bruker Avance 400 MHz spectrometer equipped with 2.5 mm probes. Samples were spun between 16 to 20 kHz at the magic angle using ZrO<sub>2</sub> rotors. <sup>13</sup>C MAS experiments were performed with a recycle delay of 20 s. <sup>13</sup>C CP/MAS spectra were recorded with a recycle delay of 2 s and a contact time of 4 ms. Hahn-echo scheme were synchronized with the spinning rate.

*Transmission Electron Microscopy (TEM) and High resolution TEM (HRTEM).* The NPs were observed by TEM and HRTEM after deposition of a drop of a solution of the isolated nanoparticles after dispersion in THF on a copper grid covered with amorphous carbon. TEM analyses were performed at the UMS-Castaing by using a JEOL JEM 1400 electron microscope operating at 120 kV. The

approximation of the particles mean size was made through a manual analysis of enlarged micrographs by measuring 300 particles on a given grid.

HRTEM observations were performed using a Probe Corrected JEOL JEM-ARM200F Cold FEG equipped with a High Angle EDX detector working at 200 kV.

*Scanning Electron Microscopy – Energy dispersive XRay spectroscopie (SEM-EDX).* Scanning electron microscopy with energy dispersive X-ray spectroscopy (SEM/EDS) was performed on a JEOL JSM 7800F operated at 10 kV with a thermally assisted Schottky electron gun and equipped with a Bruker XFlash 6|60 detector (silicon drift detector technology). Samples for SEM/EDS analysis were prepared by pressing powder of NPs@SILPs on carbon tape.

*Infrared spectroscopy (IR).* ATR IR-FT spectra were recorded on a Thermo Scientific Nicolet 6700 spectrometer in the range 4000-600  $\text{cm}^{-1}$ .

*High-performance liquid chromatography (HPLC):* HPLC chromatograms were recorded using a Phenomenex chiral column [3126 (D)-penicillamine (ref 00F-3126-E0); 25 cm  $\times$  4.6 mm]. Mobile phase: 2mM  $\text{CuSO}_4$ . Flow rate: 1.0  $\text{ml}\cdot\text{min}^{-1}$ .  $T^{\text{a}}$ : 22  $^{\circ}\text{C}$ . detector: UV at 254 nm.

### Synthesis of Ru, Pt and RuPt NPs

**Ru NPs** were synthesized according to the procedure described in the literature:<sup>1</sup> Typically, a Schlenk flask was charged with **PrIPr** (34.7 mg, 0.099 mmol, 0.25 equiv.) and  $\text{KOtBu}$  (12.2 mg, 0.109 mmol). The solids were suspended in THF (30 mL) and stirred at r.t. for 20 h. The resulting solution (yellow-orange) was transferred under an argon atmosphere into a 250 mL Fisher-Porter bottle charged with a frozen solution ( $-80\text{ }^{\circ}\text{C}$ ) of  $\text{Ru}(\text{COD})(\text{COT})$  (125 mg, 0.395 mmol, 1 equiv.) in 30 mL of THF (previously degassed). The Fisher-Porter reactor was pressurized with 3 bar of  $\text{H}_2$ , the solution was stirred for 20 hours at r.t. leading to a black homogeneous solution. After that, the remaining  $\text{H}_2$  pressure was evacuated, the solution was concentrated to 2-3 mL, and 30 mL of pentane were added. The resulting black precipitate was washed with pentane (50 mL) and dried overnight under vacuum. TGA measurements gave the following Pt content: 53 %. Yield: 64mg, 84%.

**Pt NPs:** A Schlenk flask was charged with **PrIPr** (68.8 mg, 0.196 mmol, 0.25 equiv.) and  $\text{KOtBu}$  (24.2 mg, 0.216 mmol). The solids were suspended in THF (30 mL) and stirred at r.t. for 20 h. The resulting solution (yellow-orange) was transferred under an argon atmosphere into a 250 mL Fisher-Porter bottle charged with a frozen solution ( $-80\text{ }^{\circ}\text{C}$ ) of  $\text{Pt}(\text{NBE})_3$  (375 mg, 0.785 mmol, 1 equiv.) in 30 mL of

---

<sup>1</sup> L. M. Martinez-Prieto, E. A. Baquero, G. Pieters, J. C. Flores, E. de Jesus, C. Nayral, F. Delpéch, P. W. N. M. van Leeuwen, G. Lippens and B. Chaudret, *Chem. Commun.* **2017**, 53, 5850-5853.

THF (previously degassed). The Fisher-Porter reactor was pressurized with 3 bar of H<sub>2</sub>, the solution was stirred for 20 hours at r.t. leading to a black homogeneous solution. After that, the remaining H<sub>2</sub> pressure was evacuated, the solution was concentrated to 2-3 mL, and 30 mL of pentane were added. The resulting black precipitate was washed with pentane (50 mL) and dried overnight under vacuum. TGA measurements gave the following Pt content: 76 %. Yield: 120mg, 60 %.

**RuPt-nor:** A Schlenk flask was charged with **PrIPr** (28.11 mg, 0.08 mmol, 0.25 equiv.) and **KOtBu** (9.87 mg, 0.088 mmol). The solids were suspended in THF (30 mL) and stirred at r.t. for 20 h. The resulting solution (yellow-orange) was transferred under argon atmosphere into a 250 mL Fisher-Porter bottle charged with a frozen solution (-80 °C) of **Ru(COD)(COT)** (50 mg, 0.16 mmol, 0.5 equiv.) and **Pt(NBE)<sub>3</sub>** (76.4 mg, 0.16 mmol, 0.5 equiv.) in 30 mL of THF (previously degassed). The Fischer-Porter reactor was pressurized with 3 bar of H<sub>2</sub>, and the solution was stirred for 20 h at r.t. leading to a black homogeneous solution. After that, the remaining H<sub>2</sub> pressure was evacuated, the solution was concentrated to 2-3 mL, and 30 mL of pentane were added. The resulting black precipitate was washed with pentane (50 mL) and dried overnight under vacuum. TGA measurements gave the following metal content: 72 %. Yield: 50 mg, 78 %.

**RuPt-DMC:** A Schlenk flask was charged with **PrIPr** (28.11 mg, 0.08 mmol, 0.25 equiv.) and **KOtBu** (9.87 mg, 0.088 mmol). The solids were suspended in THF (30 mL) and stirred at r.t. for 20 h. The resulting solution (yellow-orange) was transferred under argon atmosphere into a 250 mL Fisher-Porter bottle charged with a frozen solution (-80 °C) of **Ru(COD)(COT)** (50 mg, 0.16 mmol, 0.5 equiv.) and **Pt(CH<sub>3</sub>)<sub>2</sub>(COD)** (53.33 mg, 0.16 mmol, 0.5 equiv.) in 30 mL of THF (previously degassed). The Fischer-Porter reactor was pressurized with 3 bar of H<sub>2</sub>, and the solution was stirred for 20 h at r.t. leading to a black homogeneous solution. After that, the remaining H<sub>2</sub> pressure was evacuated, the solution was concentrated to 2-3 mL, and 30 mL of pentane were added. The resulting black precipitate was washed with pentane (50 mL) and dried overnight under vacuum. TGA gave the following metal content: 68 %. Yield: 50 mg, 81 %.

**RuPt-dba:** A Schlenk flask was charged with **PrIPr** (28.11 mg, 0.08 mmol, 0.25 equiv.) and **KOtBu** (9.87 mg, 0.088 mmol). The solids were suspended in THF (30 mL) and stirred at r.t. for 20 h. The resulting solution (yellow-orange) was transferred under argon atmosphere into a 250 mL Fisher-Porter bottle charged with a frozen solution (-80 °C) of **Ru(COD)(COT)** (50 mg, 0.16 mmol, 0.5 equiv.) and **Pt<sub>2</sub>dba<sub>3</sub>** (87.44 mg, 0.08 mmol of Pt<sub>2</sub>dba<sub>3</sub>, 0.5 equiv. of Pt) in 30 mL of THF (previously degassed). The Fischer-Porter reactor was pressurized with 3 bar of H<sub>2</sub>, and the solution was stirred for 20 h at r.t. leading to a black homogeneous solution. After that, the remaining H<sub>2</sub> pressure was evacuated, the solution was concentrated to 2-3 mL, and 30 mL of pentane were added. The resulting black

precipitate was washed with pentane three times (50 mL) and dried overnight under vacuum. TGA gave the following metal content: 43 %. Yield: 50 mg, 42 %.

**RuPt<sub>2</sub>-dba**: A Schlenk flask was charged with **PrIPr** (28.11 mg, 0.08 mmol, 0.17 equiv.) and KOtBu (9.87 mg, 0.088 mmol). The solids were suspended in THF (30 mL) and stirred at r.t. for 20 h. The resulting solution (yellow-orange) was transferred under argon atmosphere into a 250 mL Fisher-Porter bottle charged with a frozen solution (-80 °C) of Ru(COD)(COT) (50 mg, 0.16 mmol, 0.33 equiv.) and Pt<sub>2</sub>dba<sub>3</sub> (174.9 mg, 0.16 mmol of Pt<sub>2</sub>dba<sub>3</sub>, 0.66 equiv. of Pt) in 30 mL of THF (previously degassed). The Fischer-Porter reactor was pressurized with 3 bar of H<sub>2</sub>, and the solution was stirred for 20 h at r.t leading to a black homogeneous solution. After that, the remaining H<sub>2</sub> pressure was evacuated, the solution was concentrated to 2-3 mL, and 30 mL of pentane were added. The resulting black precipitate was washed with pentane three times (50 mL) and dried overnight under vacuum. TGA gave the following metal content: 47 %. Yield: 110 mg, 67 %.

## **S2. HRTEM and SEM-EDX**

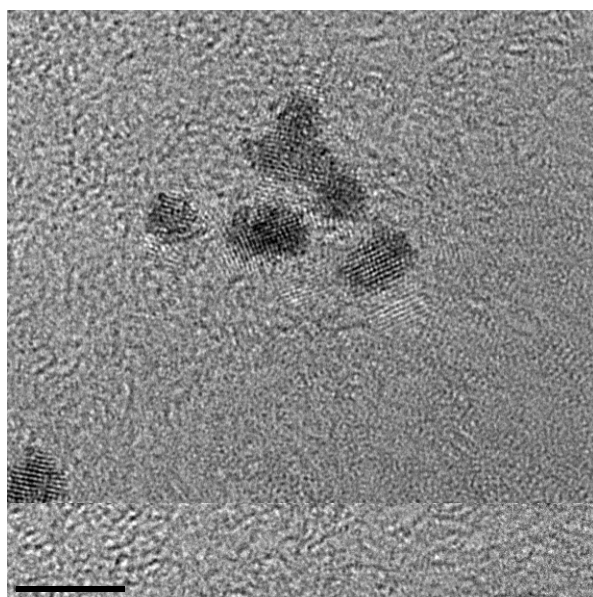

**Figure S1.** HRTEM micrograph of **RuPt-nor**

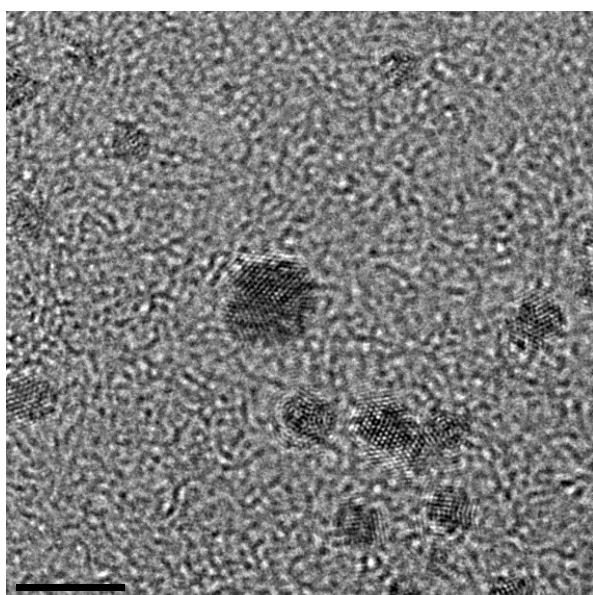

**Figure S2.** HRTEM micrograph of **RuPt-DMC**

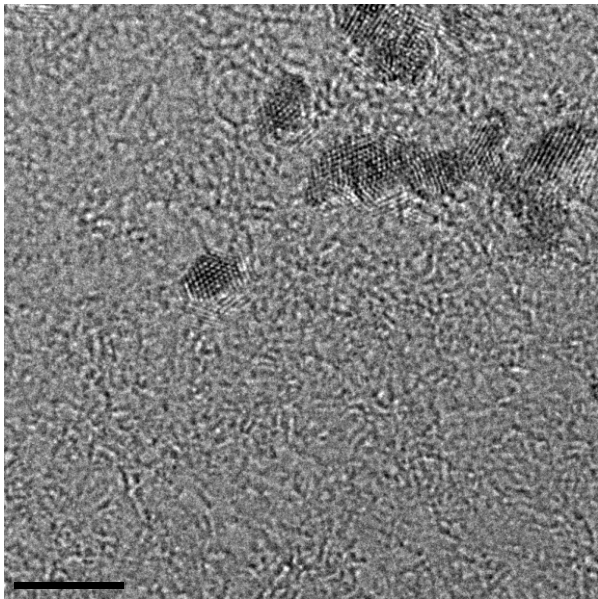

**Figure S3.** HRTEM micrograph of RuPt<sub>2</sub>-dba

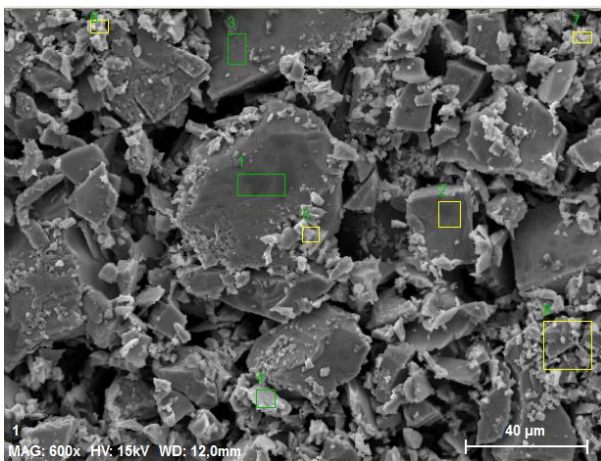

**Figure S4.** SEM-EDX analysis of RuPt-nor

| Element | Atom C [at.%]     |
|---------|-------------------|
| Pt      | 4.06              |
| C       | 50.42             |
| Ru      | 4.22              |
| O       | 26.54             |
| K       | 4.06              |
| N       | 8.91              |
| S       | 1.78              |
|         | <b>Total: 100</b> |

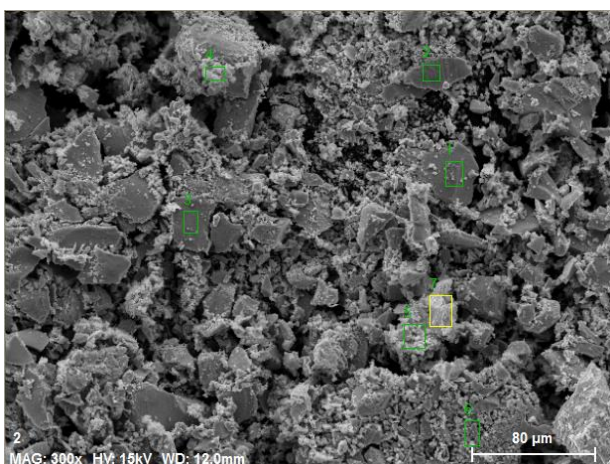

**Figure S5.** SEM-EDX analysis of RuPt-DMC

| Element | Atom C [at.%]     |
|---------|-------------------|
| Pt      | 5.76              |
| C       | 62.74             |
| Ru      | 5.95              |
| O       | 19.58             |
| K       | 3.41              |
| N       | 8.91              |
| S       | 2.56              |
|         | <b>Total: 100</b> |



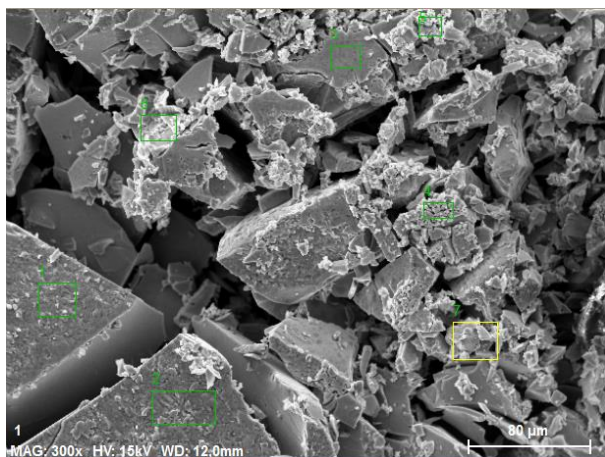

| Element | Atom C [at.%]     |
|---------|-------------------|
| Pt      | 4.50              |
| C       | 54.92             |
| Ru      | 4.20              |
| O       | 30.12             |
| K       | 4.34              |
| N       | 8.91              |
| S       | 1.59              |
|         | <b>Total: 100</b> |

**Figure S6.** SEM-EDX analysis of RuPt-DBA

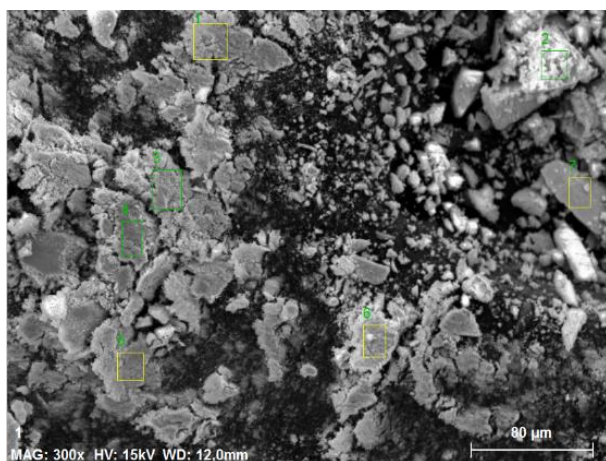

| Element | Atom C [at.%]     |
|---------|-------------------|
| Pt      | 4.65              |
| C       | 60.76             |
| Ru      | 2.20              |
| O       | 20.44             |
| K       | 3.76              |
| N       | 7.17              |
| S       | 1.03              |
|         | <b>Total: 100</b> |

**Figure S7.** SEM-EDX analysis of RuPt<sub>2</sub>-DBA

### S3. WAXS

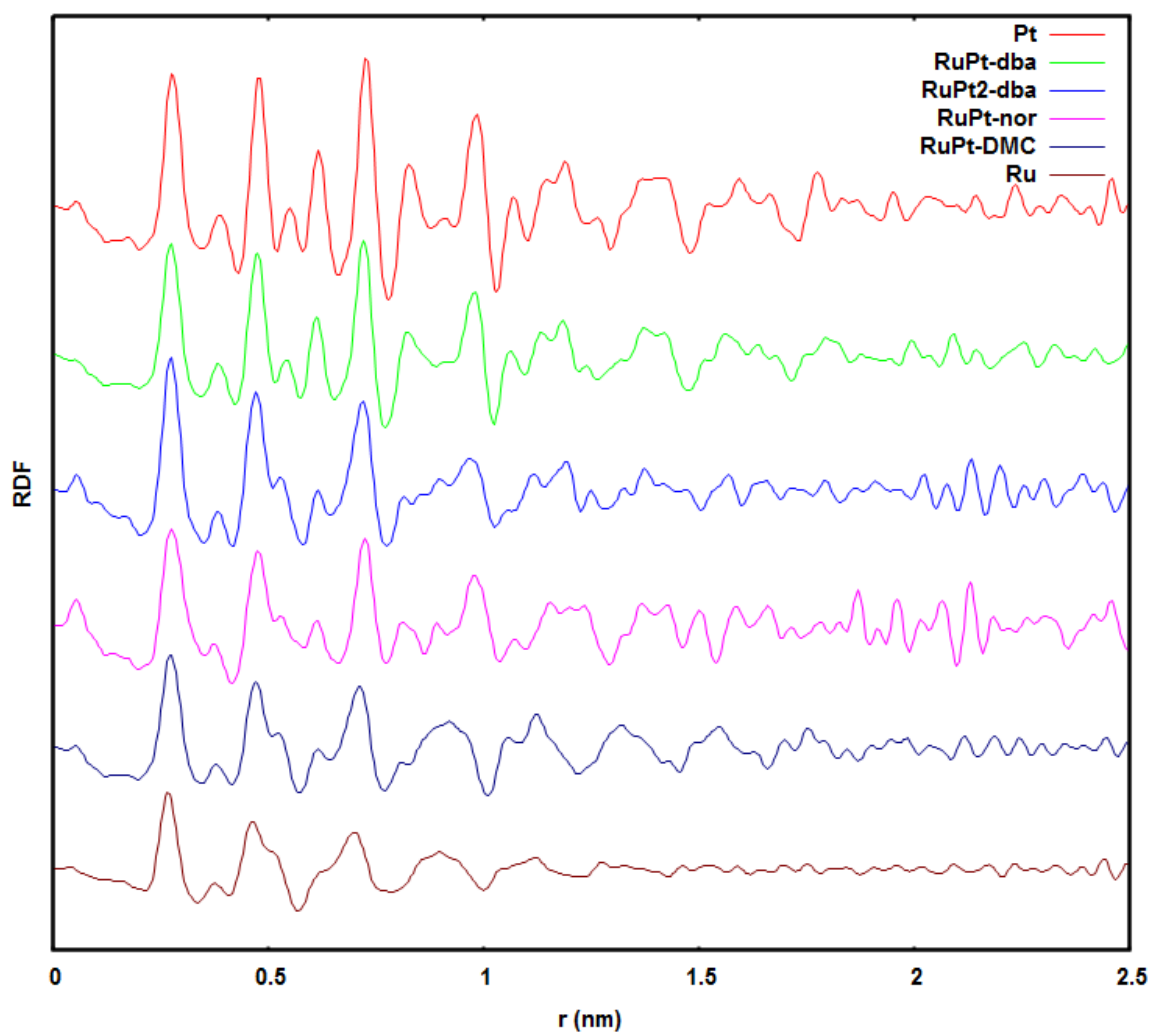

**Figure S8.** WAXS analysis of **Pt** (red), **RuPt-dba** (green), **RuPt<sub>2</sub>-dba** (blue), **RuPt-nor** (pink), **RuPt-DMC** (dark blue), and **Ru** (brown). The RDF reflects metallic particles with structures evolving gradually from fcc for Pt to hcp for Ru (see 0.6-1.0 nm characteristic range).

#### S4. FT-IR

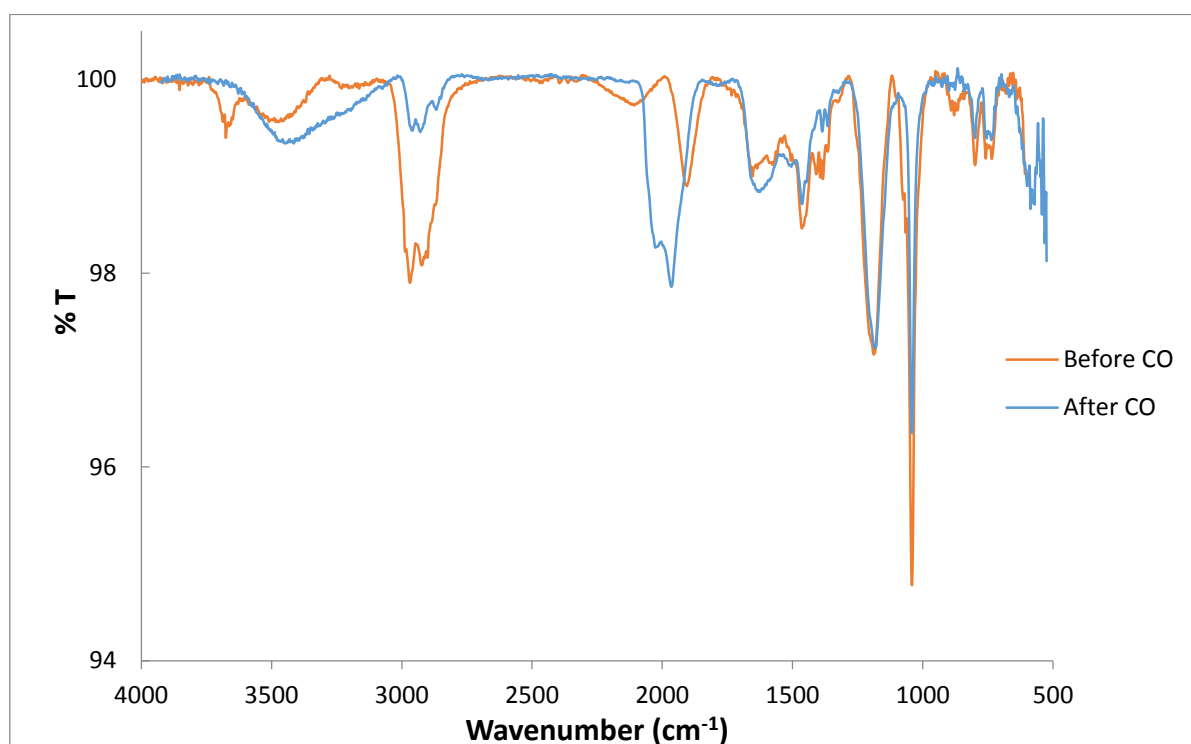

**Figure S9.** ATR FT-IR spectra of Ru NPs before (orange)\*and after (blue) reaction with CO. The spectrum after exposure to CO exhibits the absorption bands of COt ( $1965 \text{ cm}^{-1}$ ) and nCOt ( $2021 \text{ cm}^{-1}$ ).

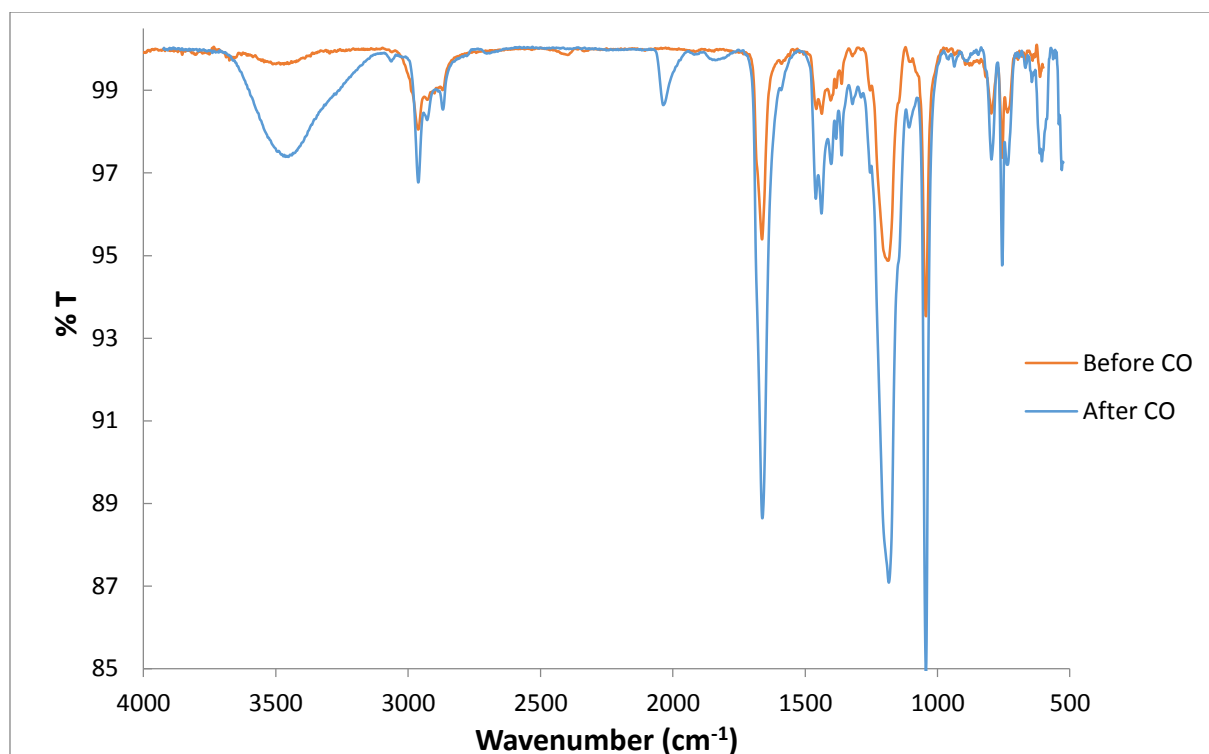

**Figure S10.** ATR FT-IR spectra of Pt NPs before (orange) and after (blue) reaction with CO. The spectrum after exposure to CO exhibits the characteristic absorption bands of COb ( $1830 \text{ cm}^{-1}$ ) and COt ( $2034 \text{ cm}^{-1}$ ).

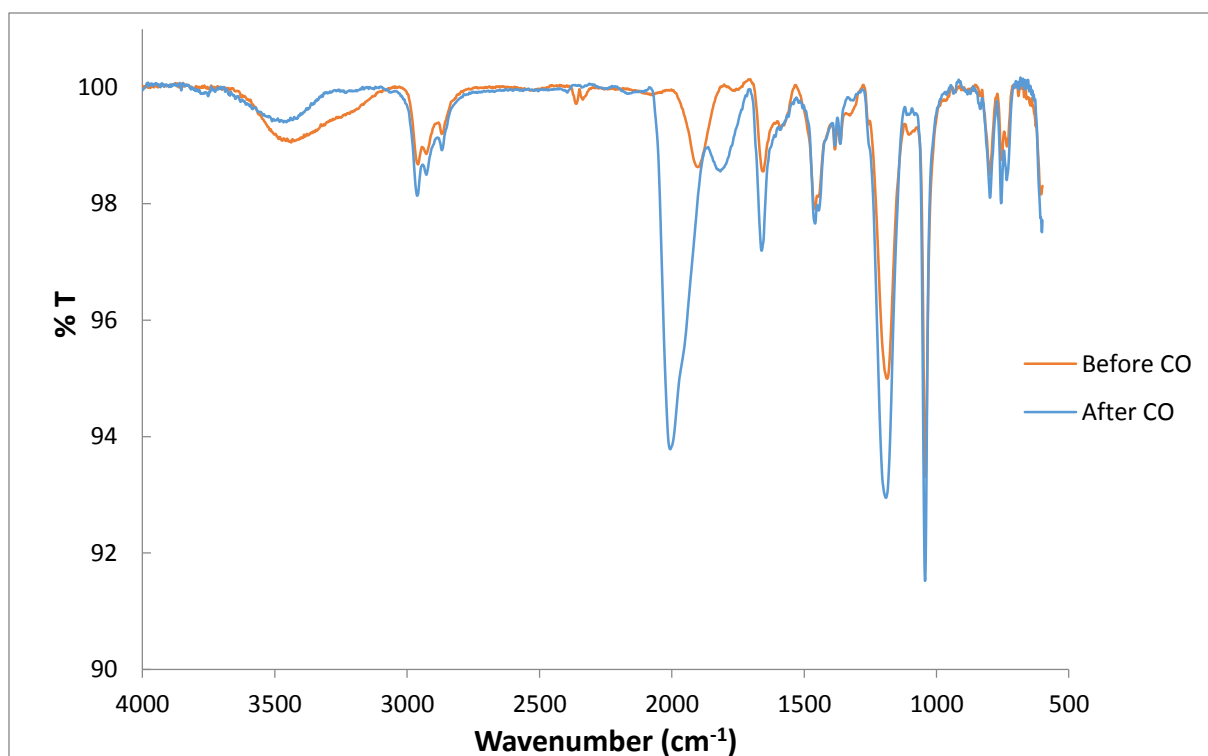

**Figure S11.** ATR FT-IR spectra of **RuPt-nor** NPs before (orange)\* and after (blue) reaction with CO. The spectrum after exposure to CO exhibits the absorption bands of CO<sub>b</sub> (1814 cm<sup>-1</sup>) and CO<sub>t</sub> (2003 cm<sup>-1</sup>).

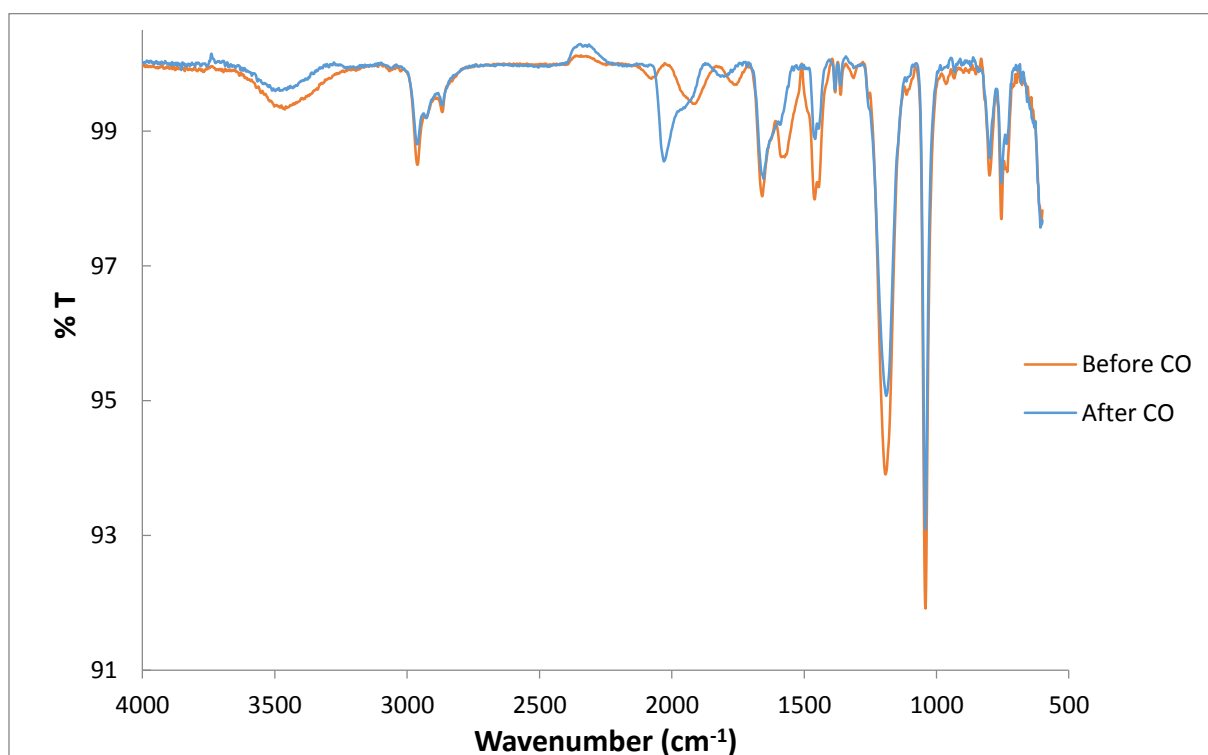

**Figure S12.** ATR FT-IR spectra of **RuPt-DMC** NPs before (orange)\* and after (blue) reaction with CO. The spectrum after exposure to CO exhibits the absorption bands of CO<sub>b</sub> (1814 cm<sup>-1</sup>) and CO<sub>t</sub> (2026 cm<sup>-1</sup>).

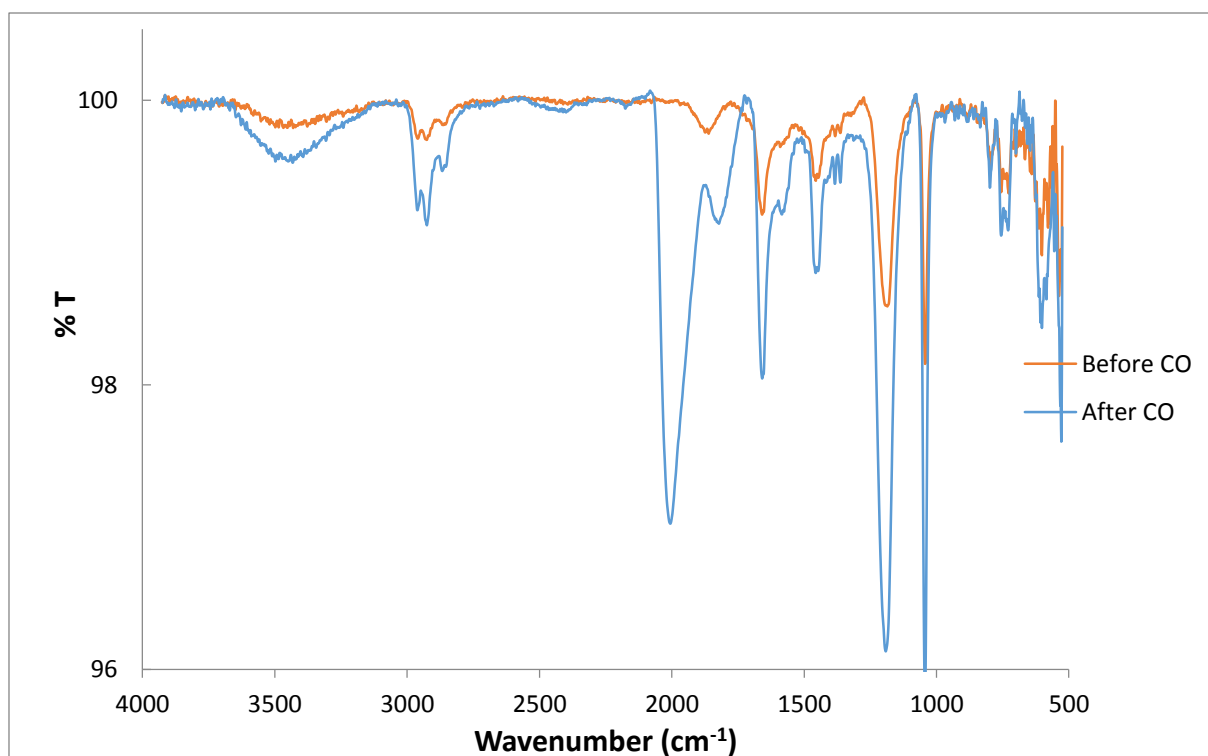

**Figure S13.** ATR FT-IR spectra of **RuPt-dba** NPs before (orange)\* and after (blue) reaction with CO. The spectrum after exposure to CO exhibits the absorption bands of CO<sub>b</sub> (1816 cm<sup>-1</sup>) and CO<sub>t</sub> (2005 cm<sup>-1</sup>).

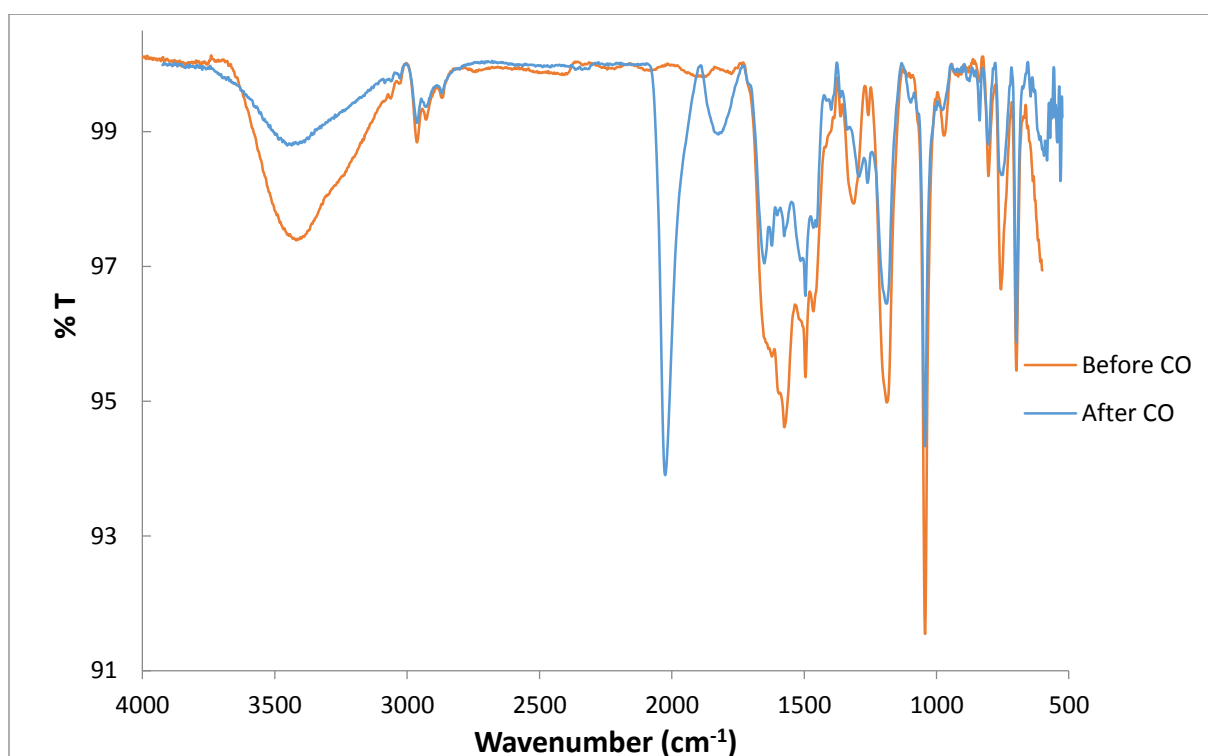

**Figure S14.** ATR FT-IR spectra of **RuPt<sub>2</sub>-dba** NPs before (orange) and after (blue) reaction with CO. The spectrum after exposure to CO exhibits the absorption bands of CO<sub>b</sub> (1824 cm<sup>-1</sup>) and CO<sub>t</sub> (2024 cm<sup>-1</sup>).

\* FT-IR spectra before (orange) exposure to carbon monoxide show a CO absorption band (1916-1922  $\text{cm}^{-1}$ ) in Figures S11, S12, S12 and S14. This CO was produced during the Ru NPs synthesis through a decarbonylation process of the THF used as solvent.<sup>2</sup>

---

<sup>2</sup> L. M. Martínez-Prieto, C. Urbaneja, P. Palma, J. Campora, K. Philippot, B. Chaudret, *Chem. Comm.* **2015**, *51*, 4647.

## S5. MAS NMR

Before  $^{13}\text{C}$  exposure:

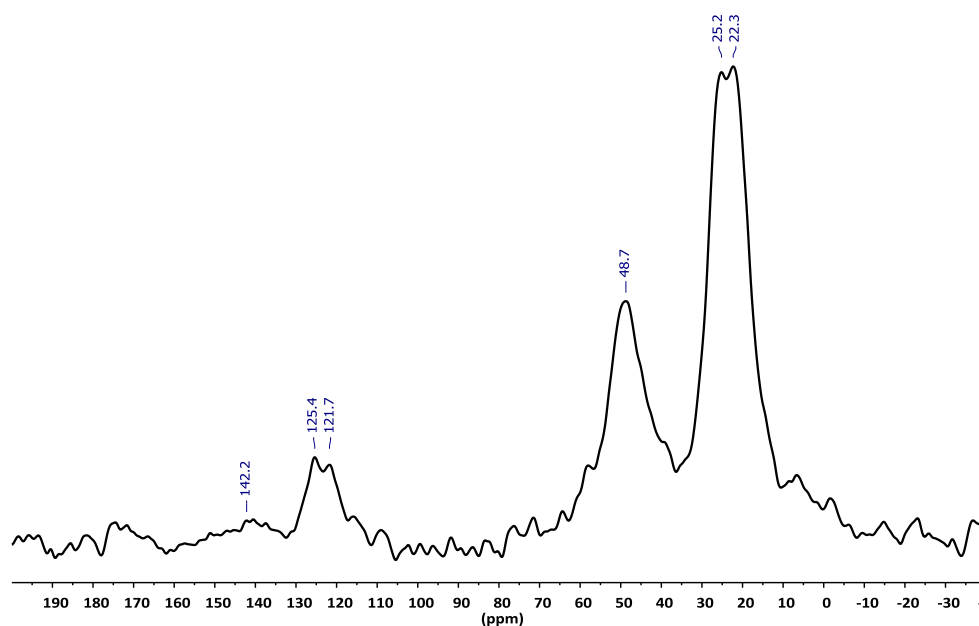

**Figure S15.**  $^{13}\text{C}$  CP-MAS NMR spectrum of **Ru** NPs. Signals: 142.2 ppm quaternary carbons of aromatic ring;  $\sim$  125-121 ppm protonated carbons of aromatic ring and imidazolium backbone; 48.7 ppm  $\alpha$  and  $\gamma$  alkyl chain  $\text{CH}_2$  groups of the sulfonated N-substituent;  $\sim$  26-22 ppm isopropyl and  $\beta$  alkyl chain  $\text{CH}_2$  groups. The imidazolium carbene carbon is not observed due to a broadening of the peak.

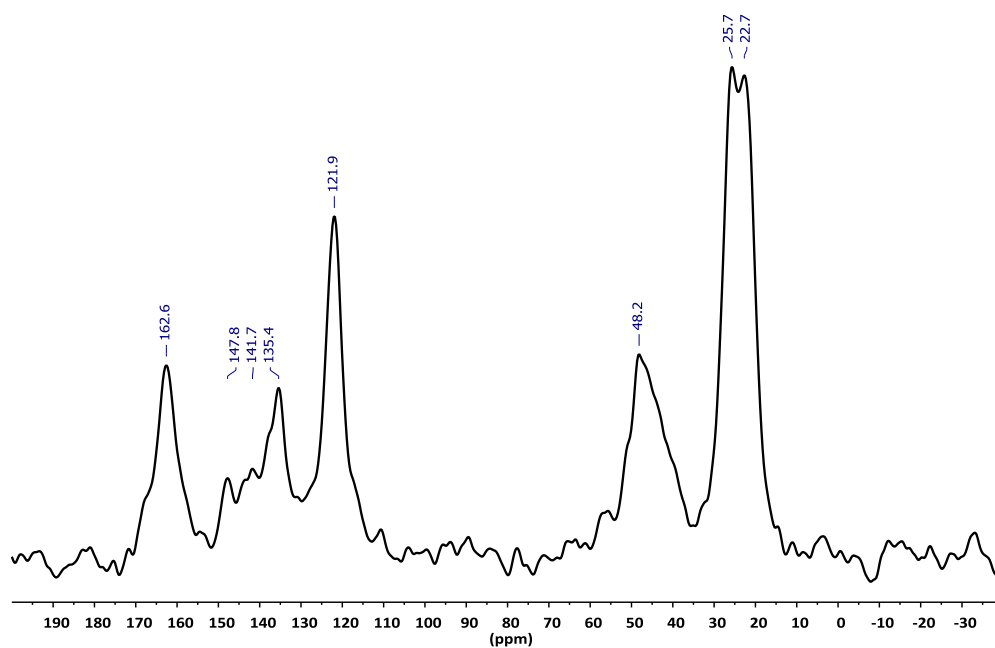

**Figure S16.**  $^{13}\text{C}$  CP-MAS NMR spectrum of **Pt** NPs. Signals: 162.6 ppm imidazolium carbene carbon;  $\sim$  148-135 ppm quaternary carbons of aromatic ring; 121.9 ppm protonated carbons of aromatic ring and imidazolium backbone; 48.2 ppm  $\alpha$  and  $\gamma$  alkyl chain  $\text{CH}_2$  groups of the sulfonated N-substituent;  $\sim$  26-22 ppm isopropyl and  $\beta$  alkyl chain  $\text{CH}_2$  groups.

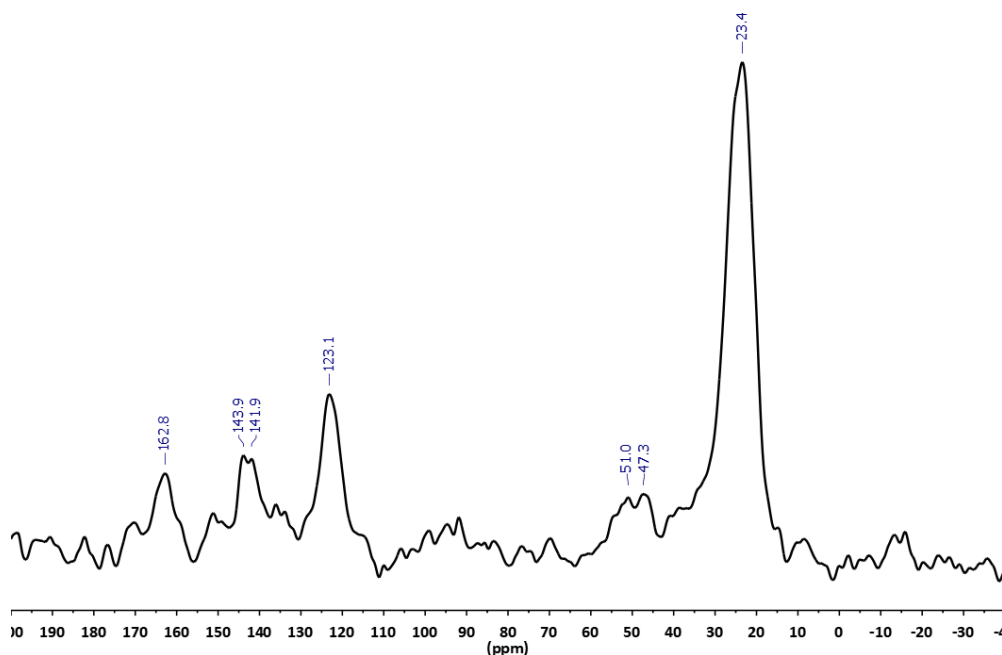

**Figure S17.**  $^{13}\text{C}$  CP-MAS NMR spectrum of **RuPt-nor** NPs. Signals: 162.8 ppm imidazolium carbene carbon; ~143-141 ppm quaternary carbons of aromatic ring; 123.1 ppm protonated carbons of aromatic ring and imidazolium backbone; ~51-47 ppm  $\alpha$  and  $\gamma$  alkyl chain  $\text{CH}_2$  groups of the sulfonated N-substituent; 23.4 ppm isopropyl and  $\beta$  alkyl chain  $\text{CH}_2$  groups.

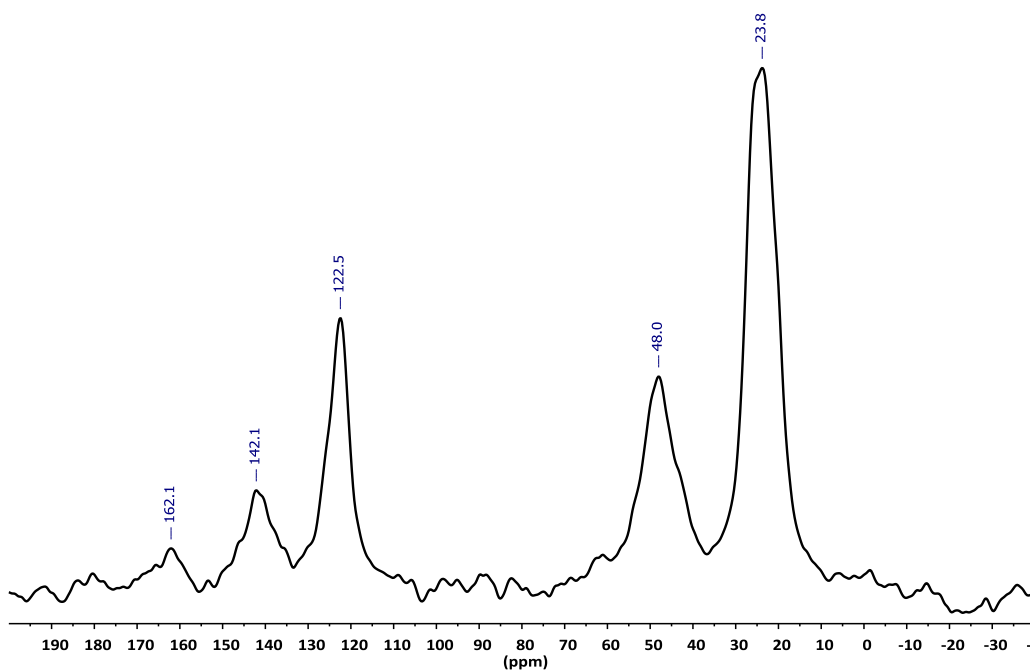

**Figure S18.**  $^{13}\text{C}$  CP-MAS NMR spectrum of **RuPt-DMC** NPs. Signals: 162.1 ppm imidazolium carbene carbon; 142.1 ppm quaternary carbons of aromatic ring; 122.5 ppm protonated carbons of aromatic ring and imidazolium backbone; 48 ppm  $\alpha$  and  $\gamma$  alkyl chain  $\text{CH}_2$  groups of the sulfonated N-substituent; 23.8 ppm isopropyl and  $\beta$  alkyl chain  $\text{CH}_2$  groups.



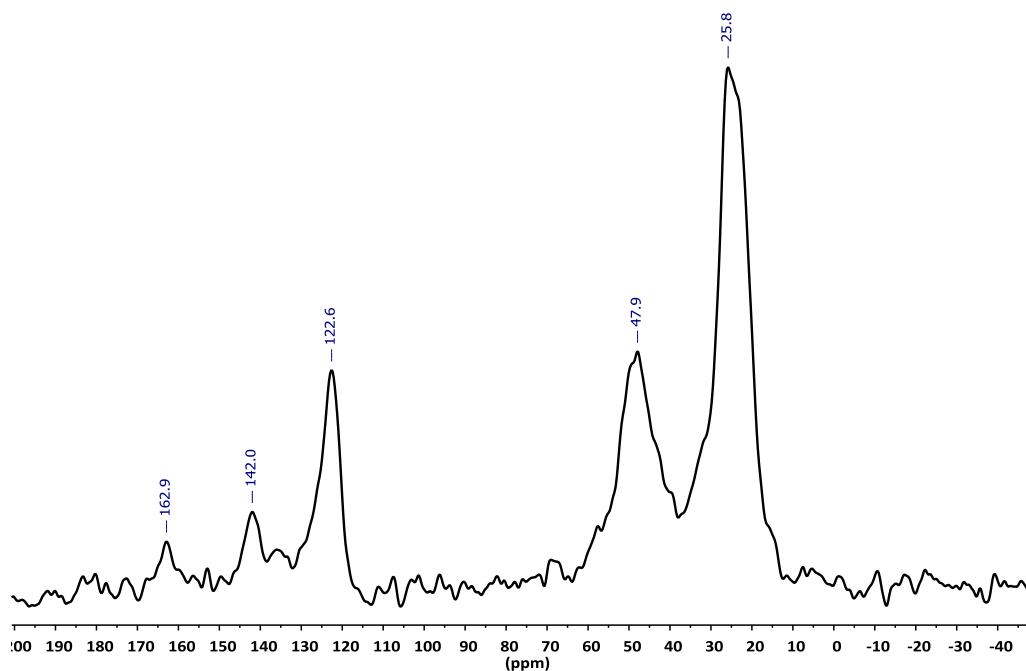

**Figure S19.**  $^{13}\text{C}$  CP-MAS NMR spectrum of **RuPt-dba** NPs. Signals: 162.9 ppm imidazolium carbene carbon; 142.0 ppm quaternary carbons of aromatic ring; 122.6 ppm protonated carbons of aromatic ring and imidazolium backbone; 47.9 ppm  $\alpha$  and  $\gamma$  alkyl chain  $\text{CH}_2$  groups of the sulfonated N-substituent; 25.8 ppm isopropyl and  $\beta$  alkyl chain  $\text{CH}_2$  groups.

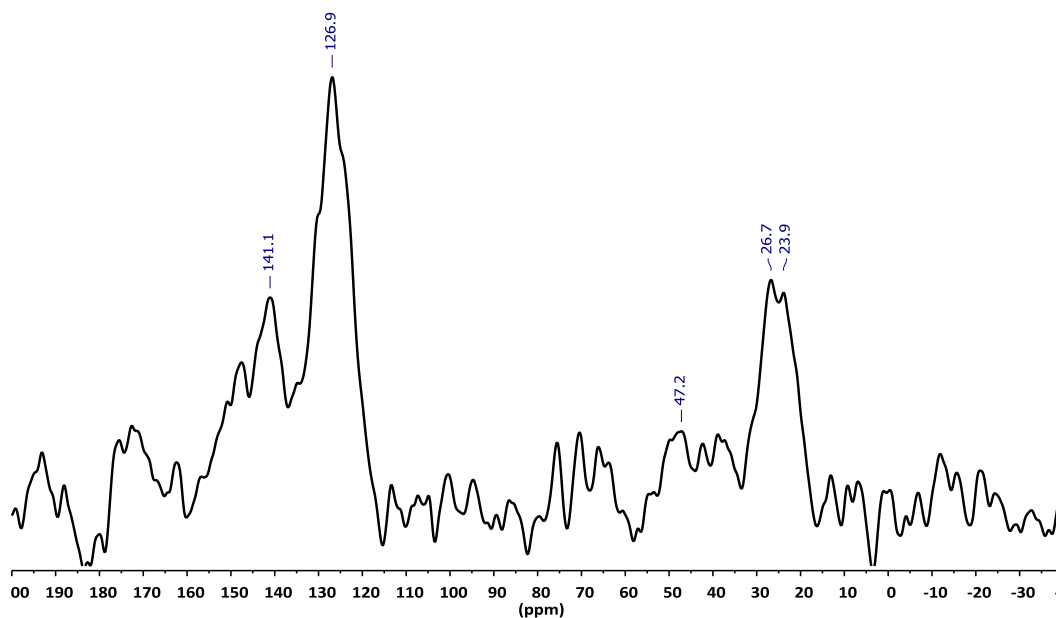

**Figure S20.**  $^{13}\text{C}$  CP-MAS NMR spectrum of **RuPt<sub>2</sub>-dba** NPs. Signals: 141.1 ppm quaternary carbons of aromatic ring; 126.9 ppm protonated carbons of aromatic ring and imidazolium backbone; 47.2 ppm  $\alpha$  and  $\gamma$  alkyl chain  $\text{CH}_2$  groups of the sulfonated N-substituent;  $\sim$  27-23 ppm isopropyl and  $\beta$  alkyl chain  $\text{CH}_2$  groups. The imidazolium carbene carbon is not observed due to a broadening of the peak.

After  $^{13}\text{C}$  CO exposure:

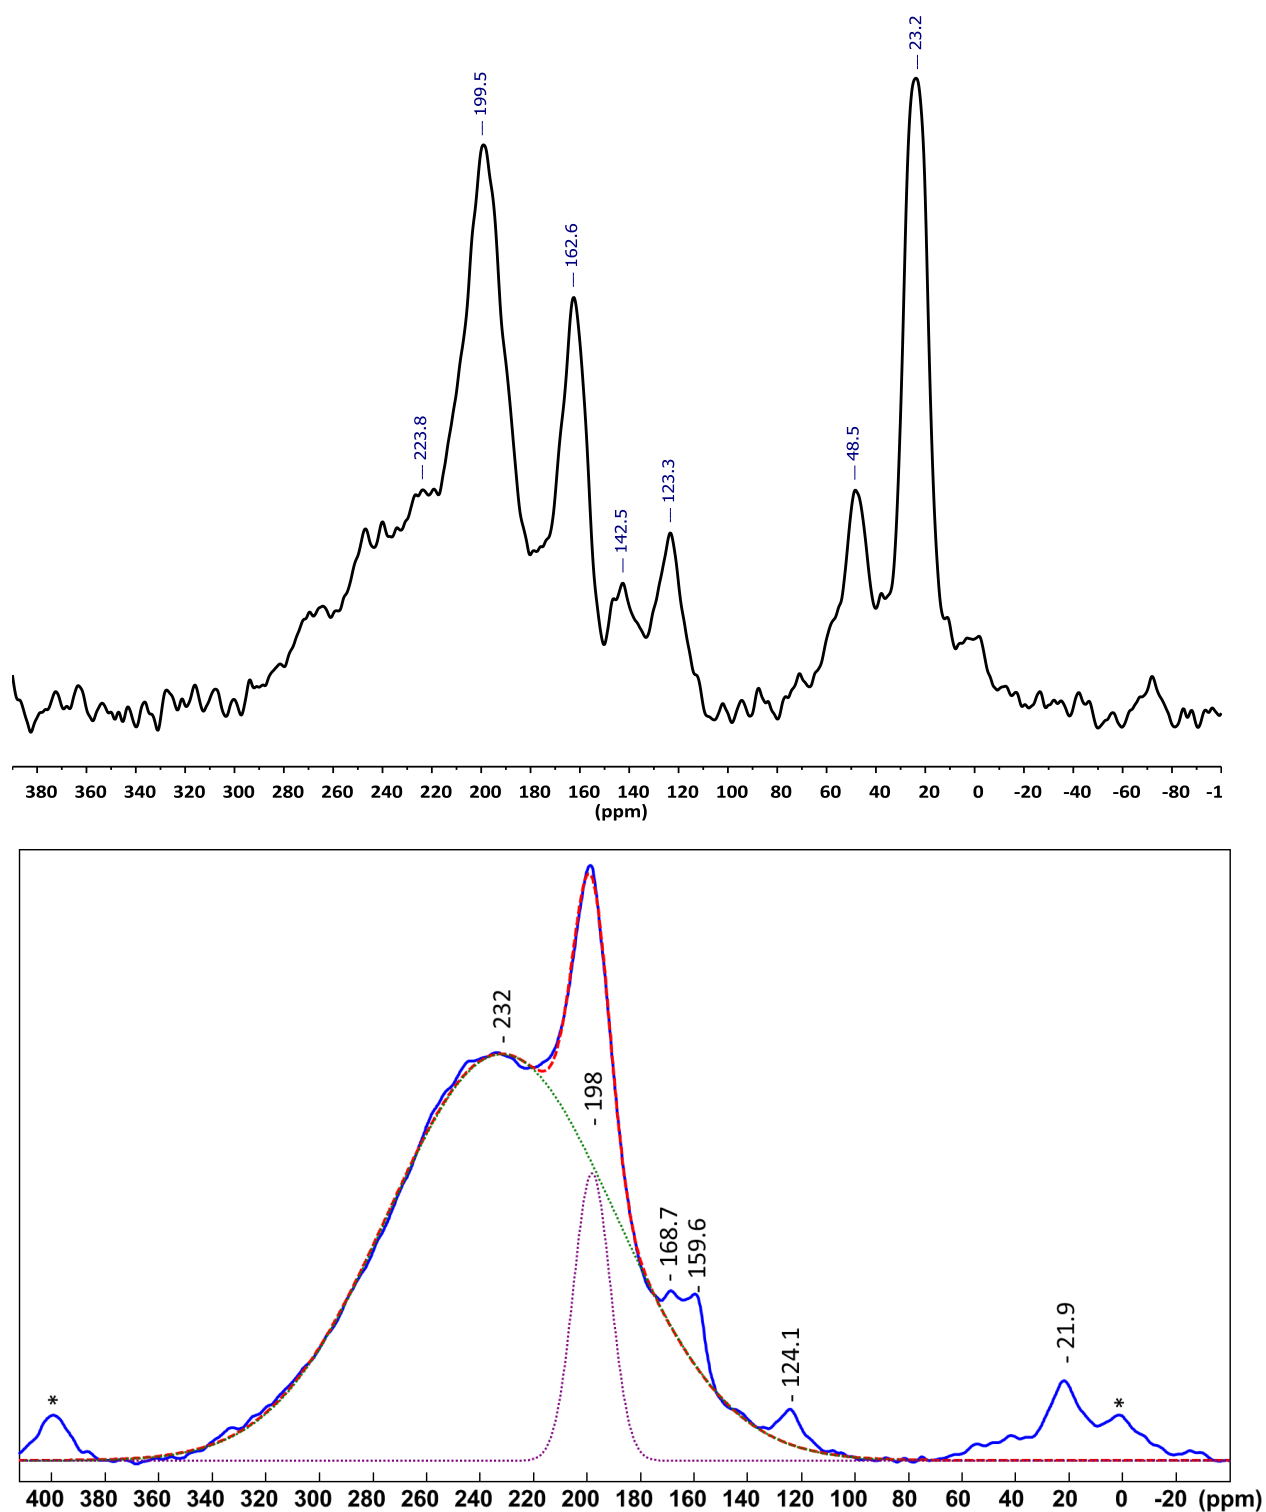

**Figure S21.**  $^{13}\text{C}$  CP-MAS (top) and Hahn-echo (bottom) NMR spectra of **Ru** NPs after exposure to  $^{13}\text{C}$  CO (1 bar, 18 h, at r.t.). In red, deconvolution of the CO signals of the  $^{13}\text{C}$  Hahn-echo NMR spectrum. \* Spinning Sidebands of  $\text{CO}_2$ .

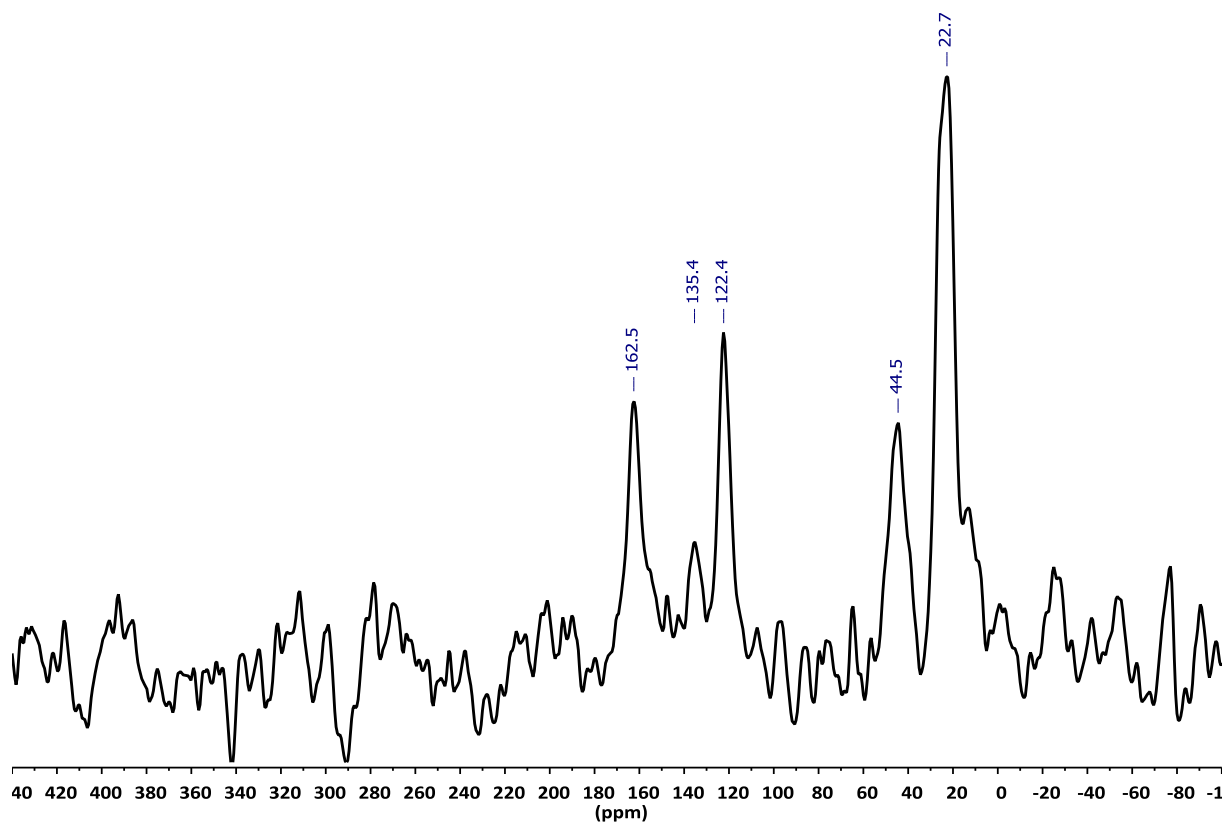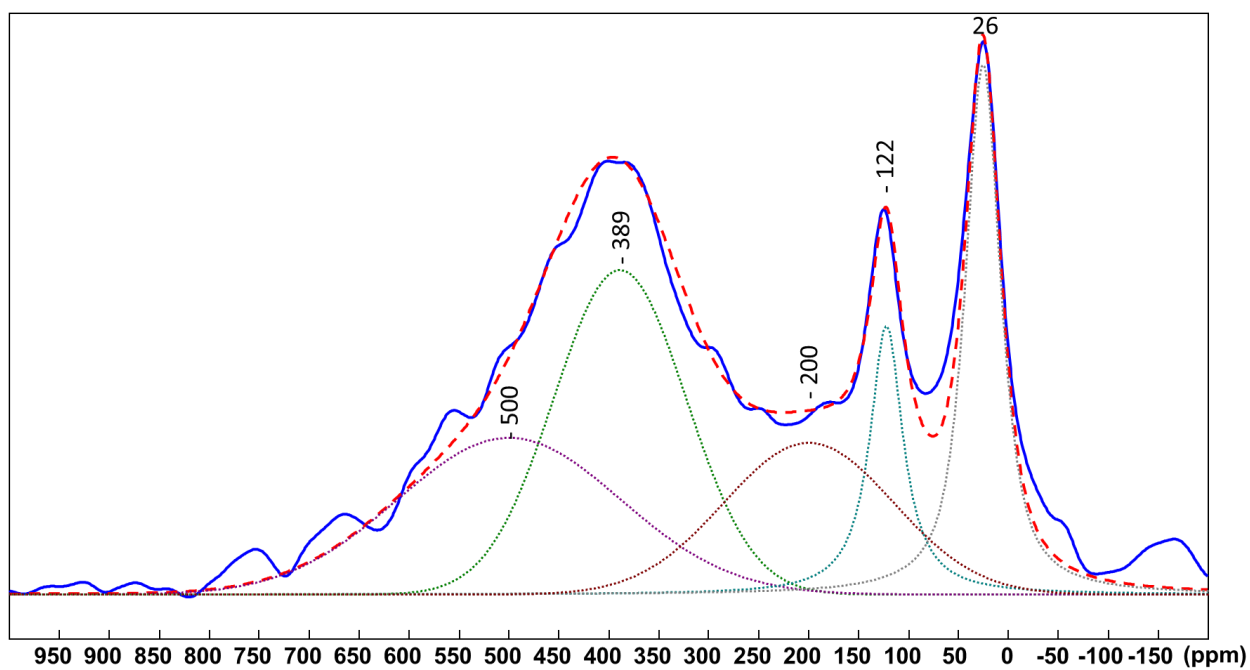

**Figure S22.**  $^{13}\text{C}$  CP-MAS (top) and Hahn-echo (bottom) NMR spectra of Pt NPs after exposure to  $^{13}\text{CO}$  (1 bar, 18 h, at r.t.). In red, signal deconvolution of the  $^{13}\text{C}$  Hahn-echo NMR spectrum.

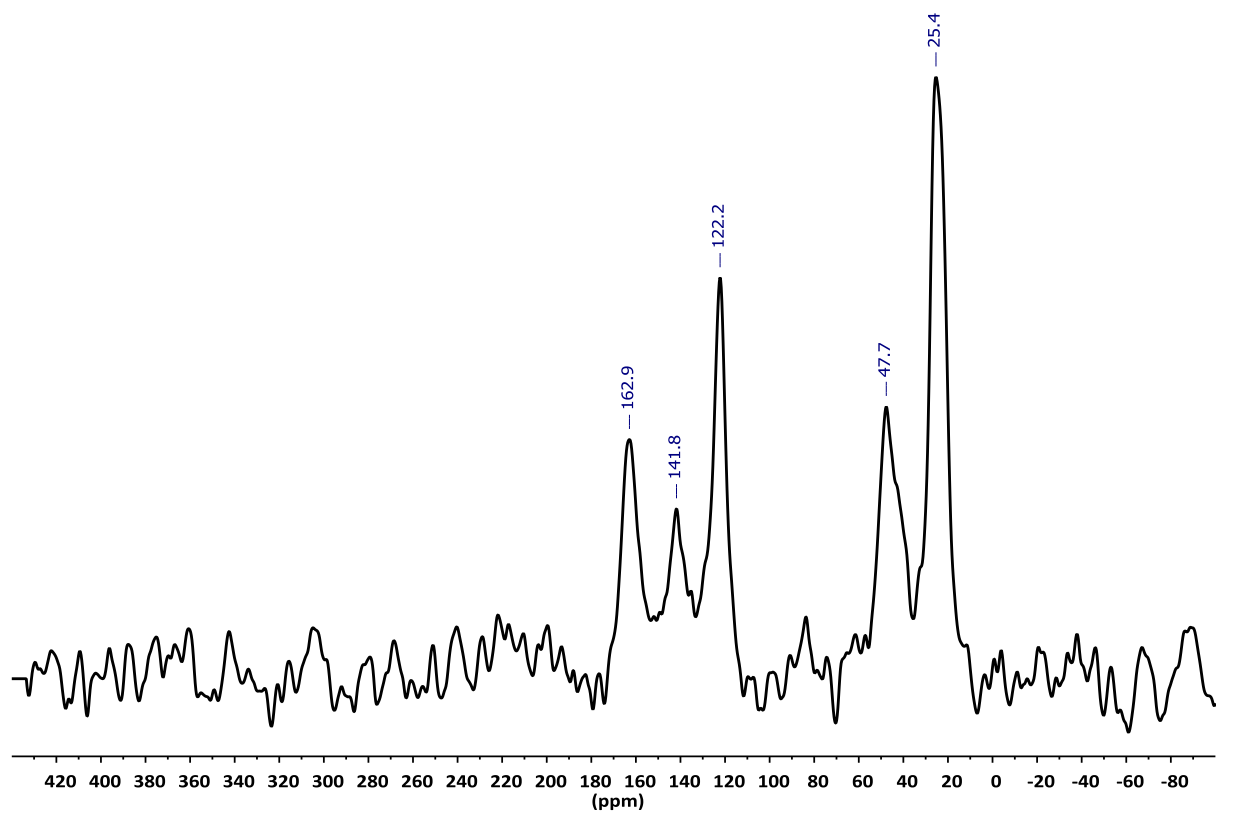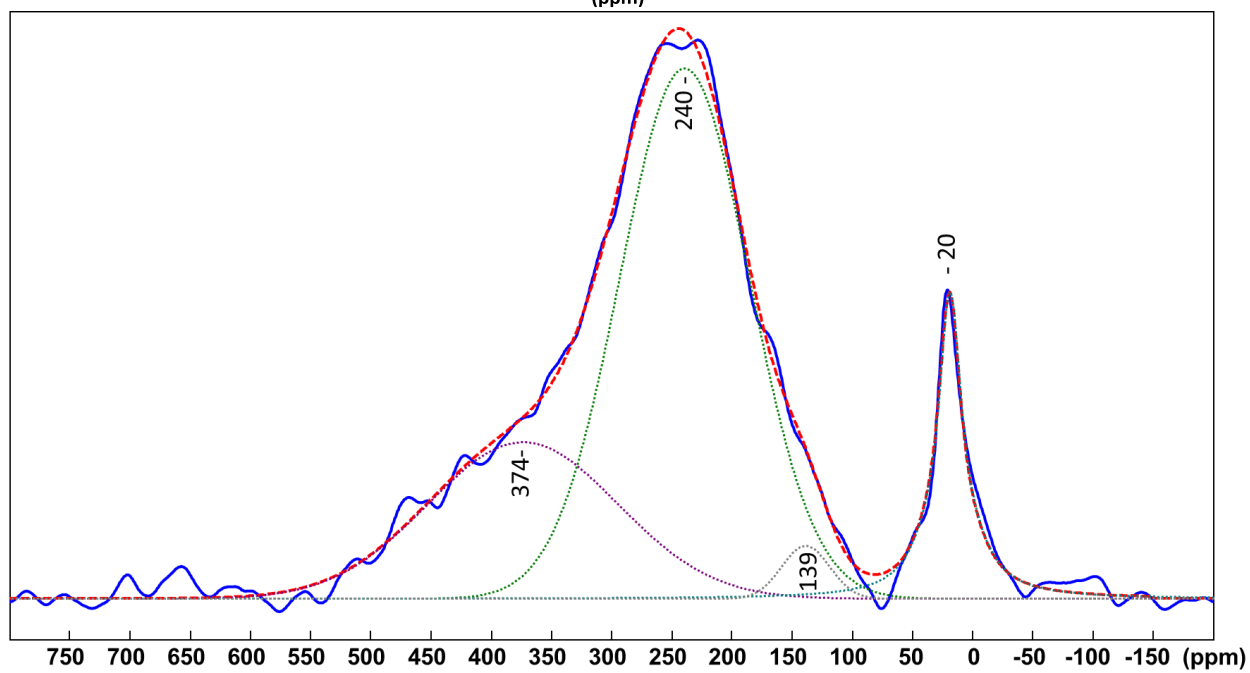

**Figure S23.**  $^{13}\text{C}$  CP-MAS (top) and Hahn-echo (bottom) NMR spectra of RuPt-nor NPs after exposure to  $^{13}\text{CO}$  (1 bar, 18 h, at r.t.). In red, signal deconvolution of the  $^{13}\text{C}$  Hahn-echo NMR spectrum.

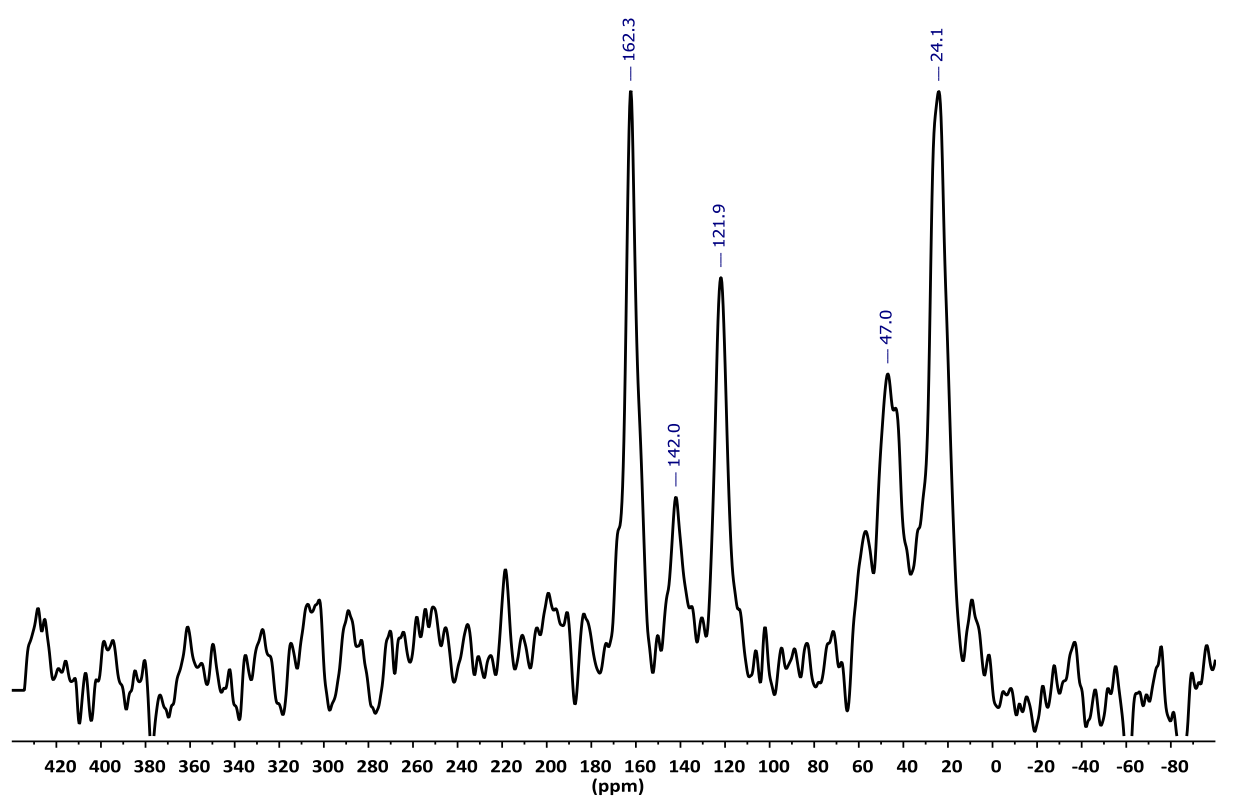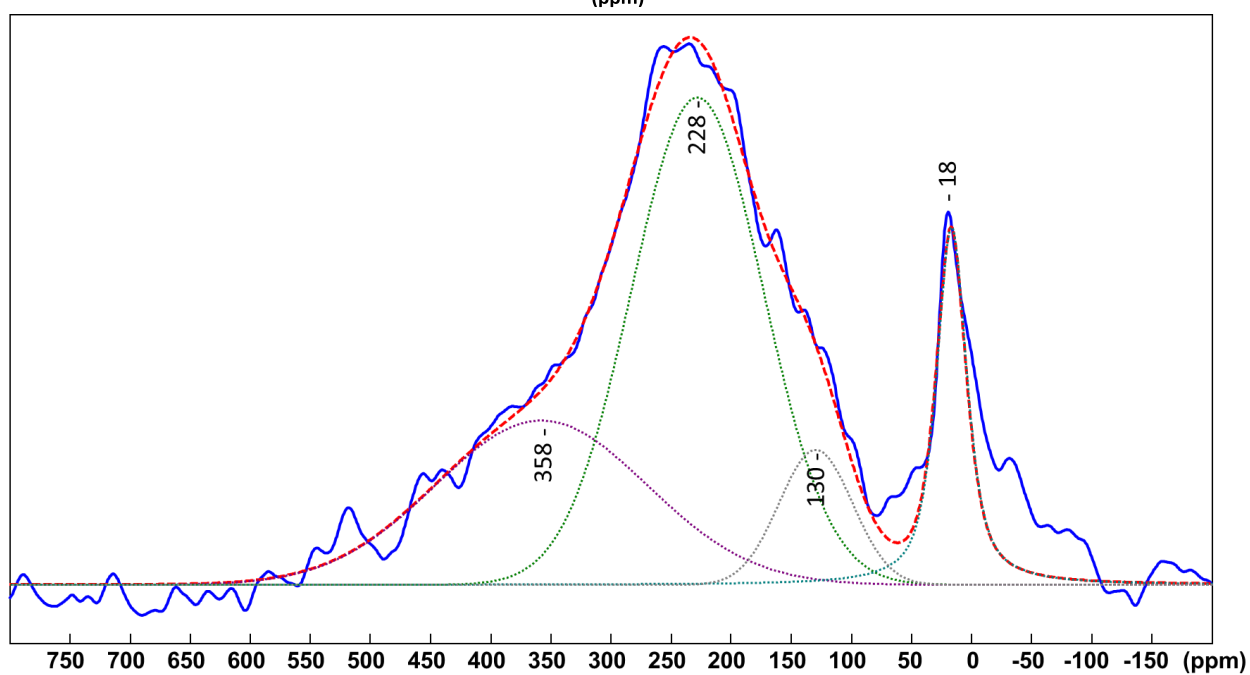

**Figure S24.**  $^{13}\text{C}$  CP-MAS (top) and Hahn-echo (bottom) NMR spectra of **RuPt-DMC** NPs after exposure to  $^{13}\text{CO}$  (1 bar, 18 h, at r.t.). In red, signal deconvolution of the  $^{13}\text{C}$  Hahn-echo NMR spectrum.

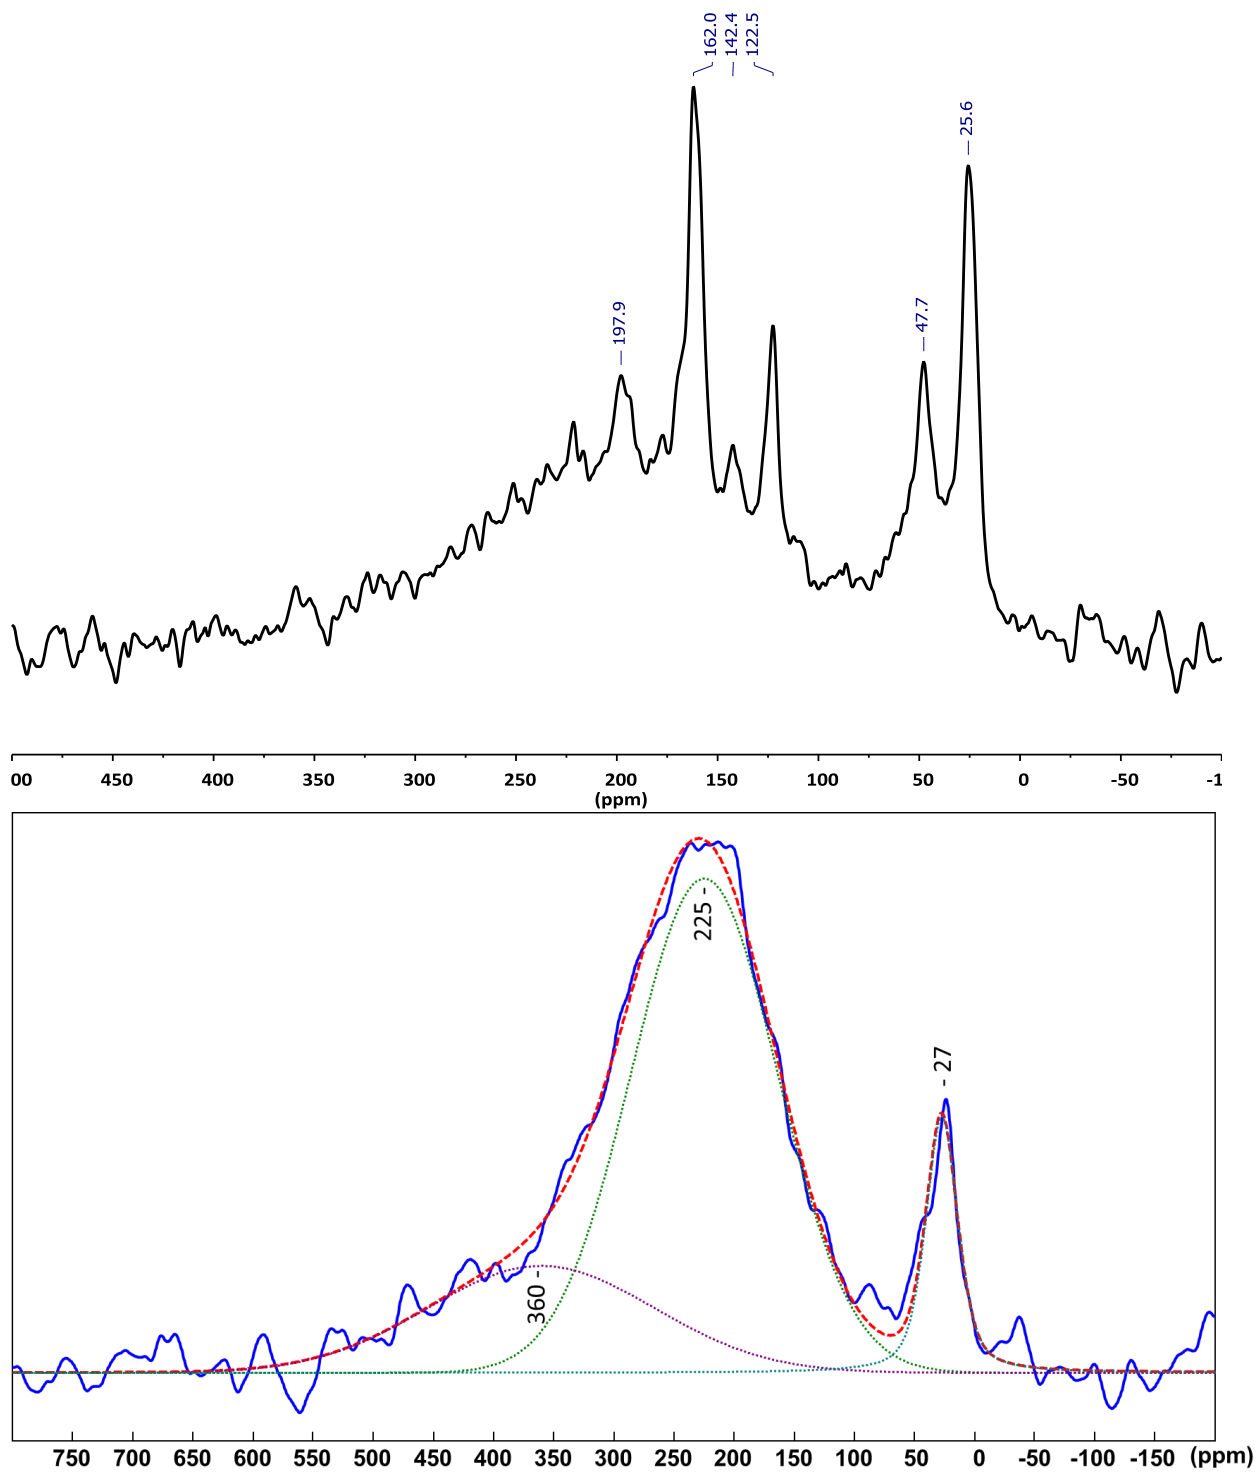

**Figure S25.**  $^{13}\text{C}$  CP-MAS (top) and Hahn-echo (bottom) NMR spectra of RuPt-dba NPs after exposure to  $^{13}\text{CO}$  (1 bar, 18 h, at r.t.). In red, signal deconvolution of the  $^{13}\text{C}$  Hahn-echo NMR spectrum.

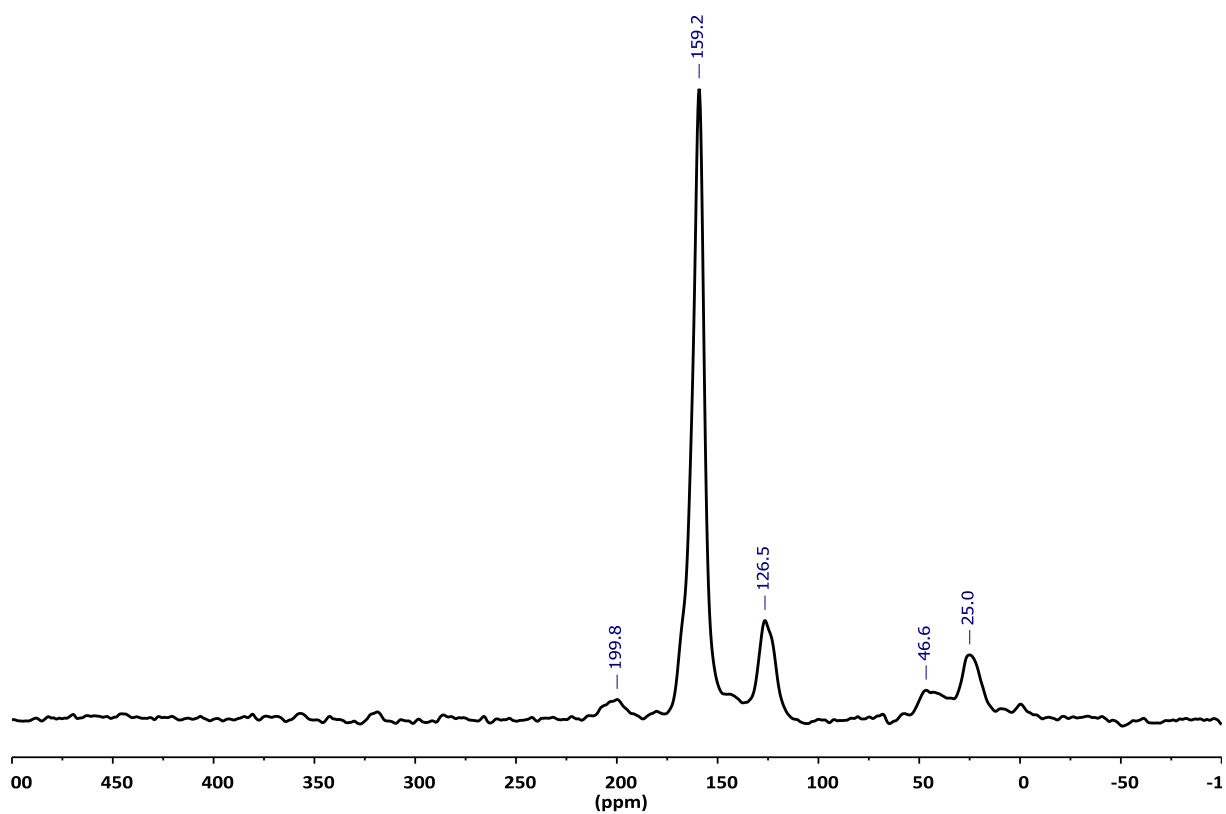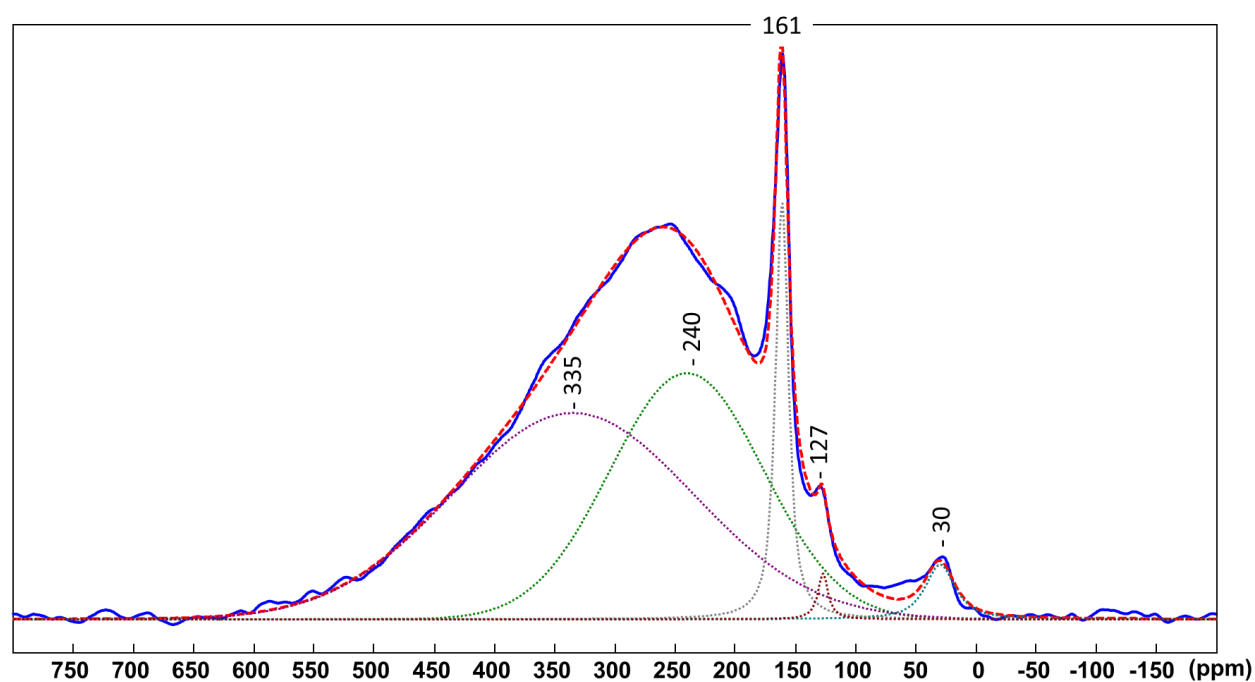

**Figure S26.**  $^{13}\text{C}$  CP-MAS (top) and Hahn-echo (bottom) NMR spectra of  $\text{RuPt}_2\text{-dba}$  NPs after exposure to  $^{13}\text{CO}$  (1 bar, 18 h, at r.t.). In red, signal deconvolution of the  $^{13}\text{C}$  Hahn-echo NMR spectrum.

## **S7. Catalytic data**

### **General procedure for deuteration reactions**

A 90 mL Fisher-Porter reactor was charged with NPs (2-3 mg, 6-7 mol %) in a glove box under argon. A solution of L-lysine (21.92 mg, 0.15 mmol) in D<sub>2</sub>O (2 mL) was added and the reaction mixture was stirred at 55 °C under 2 bar D<sub>2</sub> during 42 hours. The final product was analyzed directly through <sup>1</sup>H NMR. The H/D exchange percentage was determined by the decrease of integral intensities at the specified positions compared to the starting material. Integral intensities were calibrated against hydrogen signals of position β which do not undergo H/D-exchange.

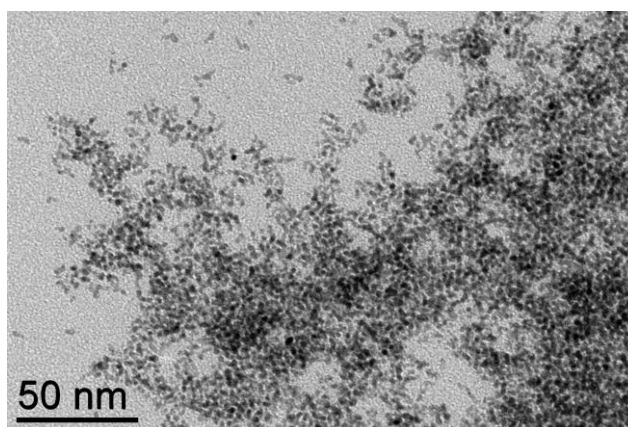

**Figure S27.** TEM pictures of RuPt-dba NPs after catalysis on L-lysine under 2 bars of D<sub>2</sub> for 42h (in comparison to Figure 1e before catalysis).



## S8. Solution NMR

$^1\text{H}$  NMR spectrum of Commercial L-lysine:

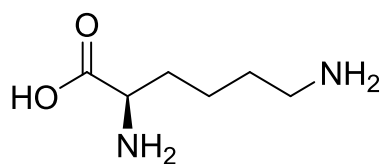

$^1\text{H}$  NMR (400 MHz, D<sub>2</sub>O)  $\delta$  3.72 (t,  $J$  = 6.13 Hz, 1H), 2.96 - 3.02 (m, 2H), 1.82 - 1.92 (m, 2H), 1.69 (quin,  $J$  = 7.64 Hz, 2H), 1.34 - 1.53 (m, 2H).

$^1\text{H}$  NMR spectra of L-lysine after deuteration with Ru NPs:

1. Ru NPs:

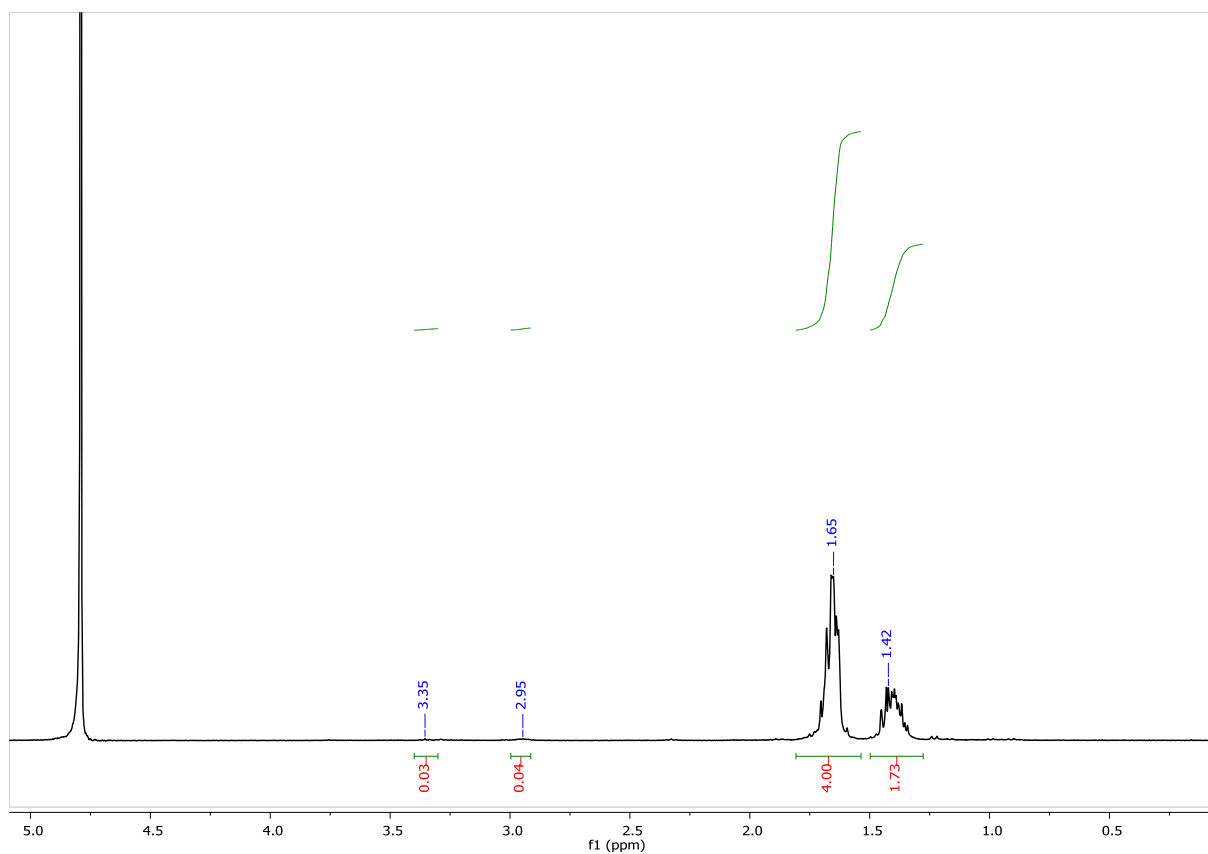

Figure S28.  $^1\text{H}$  NMR spectrum after deuteration of L-lysine using Ru NPs as catalyst.

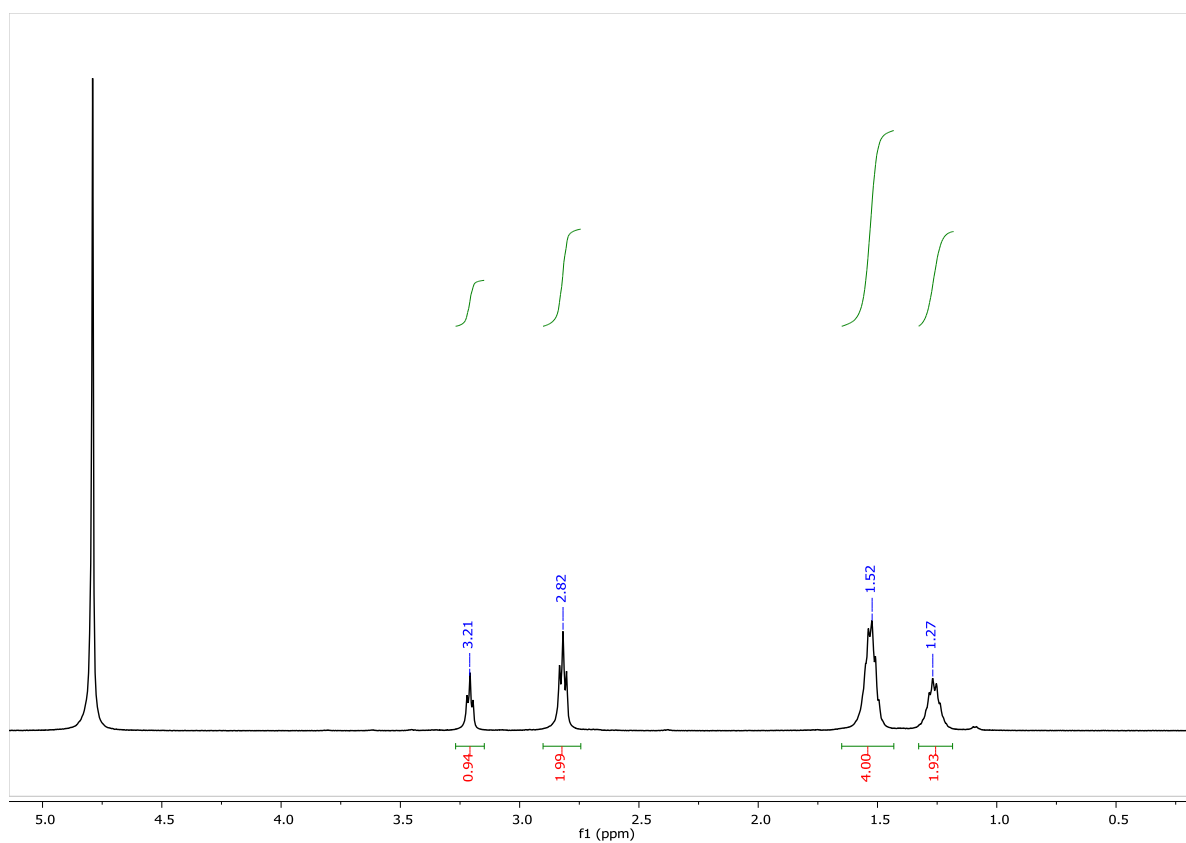

**Figure S29.**  $^1\text{H}$  NMR spectrum after deuteration of L-lysine using Pt NPs as catalyst.

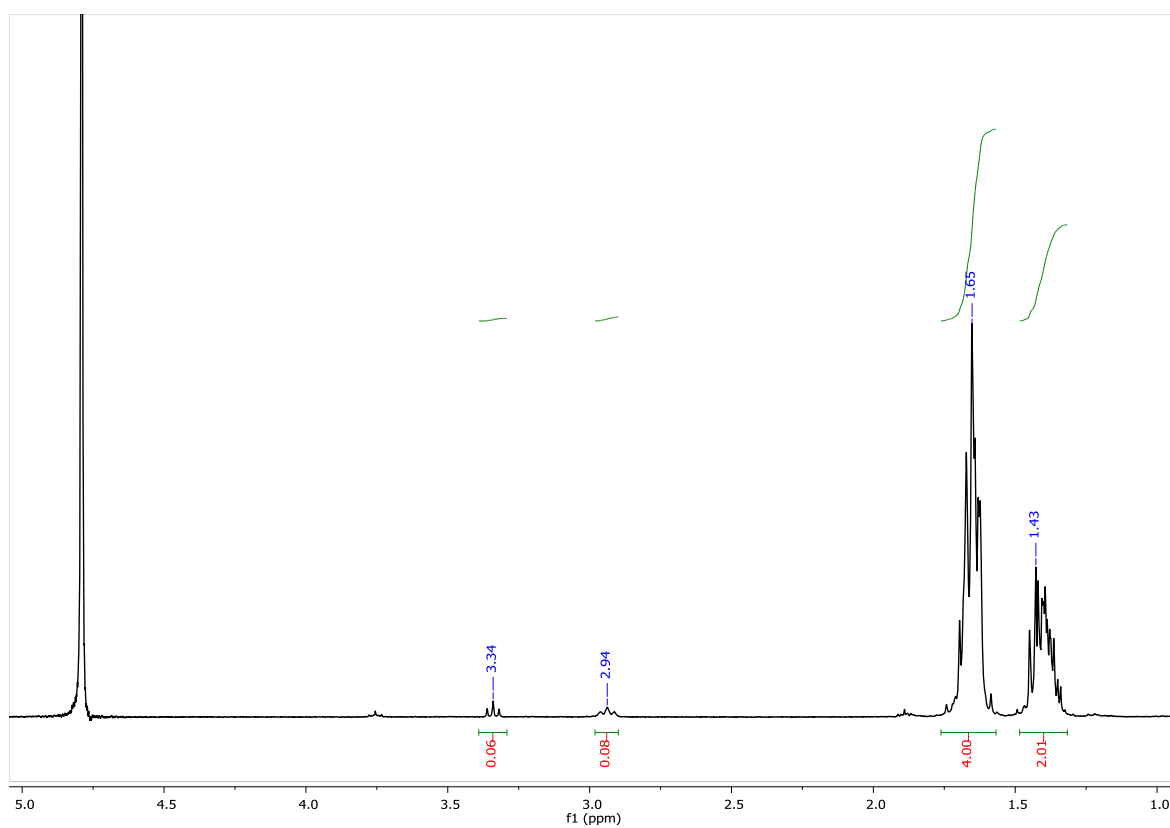

**Figure S30.**  $^1\text{H}$  NMR spectrum after deuteration of L-lysine using RuPt-nor NPs as catalyst.

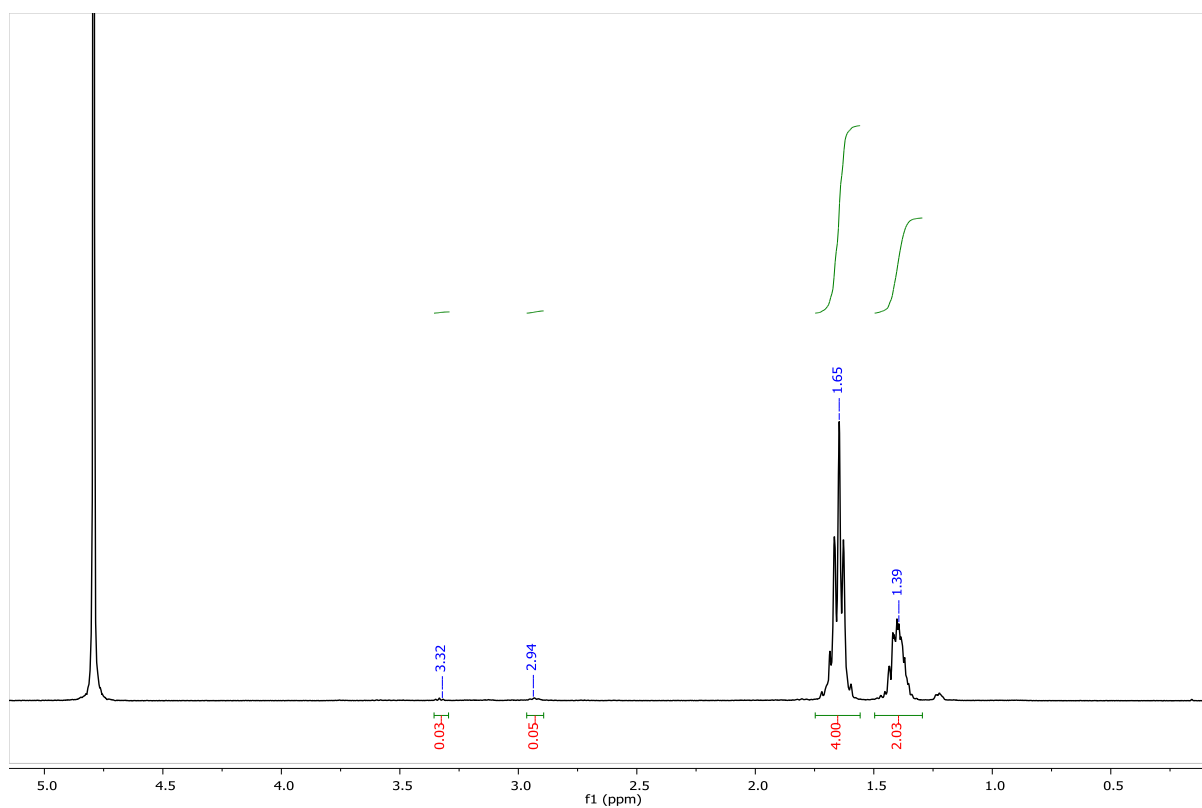

**Figure S31.**  $^1\text{H}$  NMR spectrum after deuteration of L-lysine using RuPt-DMC NPs as catalyst.

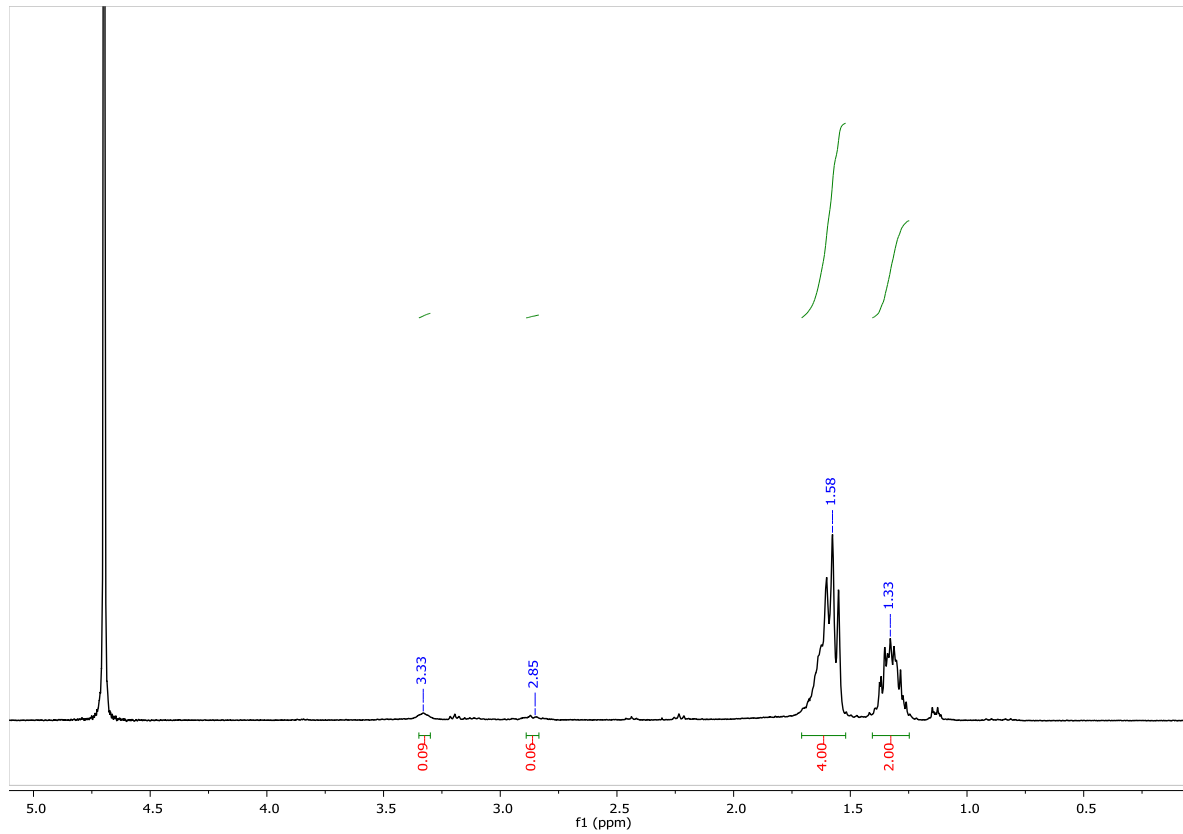

**Figure S32.**  $^1\text{H}$  NMR spectrum after deuteration of L-lysine using RuPt-dba NPs as catalyst.

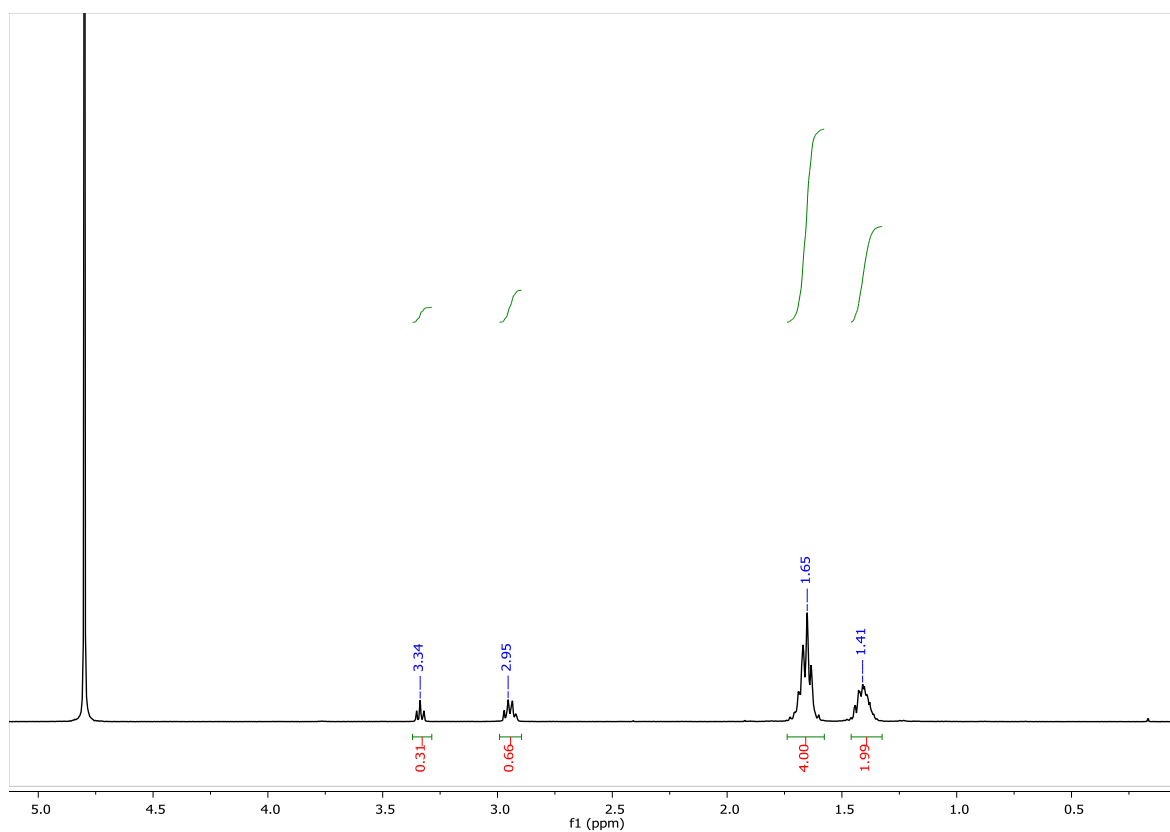

**Figure S33.**  $^1\text{H}$  NMR spectrum after deuteration of L-lysine using  $\text{RuPt}_2\text{-dba}$  NPs as catalyst.

### S9. Chemical shift perturbation

$^1\text{H}$ ,  $^{13}\text{C}$  HSQC spectra of different amounts of L-lysine (2, 5, 10 and 20mg in 600 $\mu\text{L}$  of  $\text{D}_2\text{O}$ ) with 1 mg/mL of NPs were recorded. Spectra were recorded at natural abundance on an 800MHz Bruker NMR spectrometer, equipped with a QCP cryogenic probehead. We used a sensitivity enhanced HSQC sequence<sup>3</sup> with 2048  $\times$  256 points for the  $^1\text{H}$  respectively  $^{13}\text{C}$  dimension, corresponding to a spectral window of 13.9486  $\times$  40.0000 ppm. We recorded 2 scans per increment, arriving at a total measuring time of 10 minutes per spectrum. Samples with NPs were intensely vortexed for two minutes just before the measurement, to avoid any possible sedimentation.

For each L-lysine concentration, we recorded a spectrum in the absence and presence of the NPs.

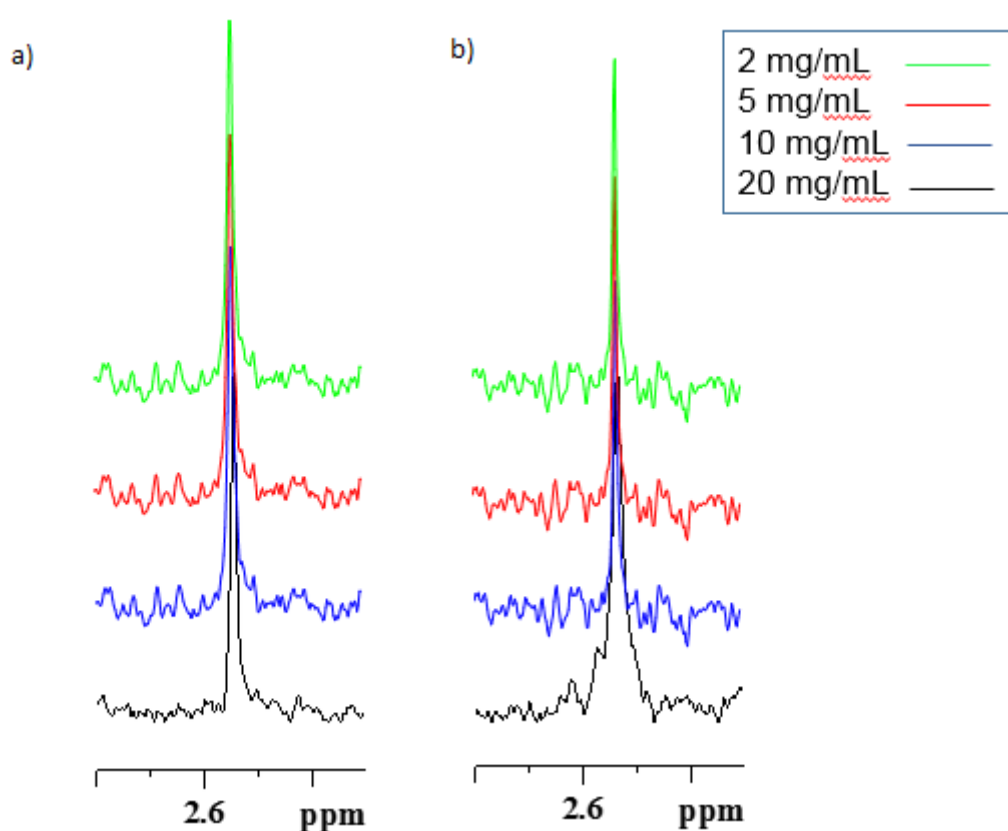

**Figure S34.**  $^{31}\text{P}$  NMR spectra for the Chemical Shift Perturbation measurements with **Ru** (a) and **RuPt-dba** (b) on the L-lysine, decreasing the concentration of lysine, at constant concentration of NPs.

<sup>3</sup> A.G. Palmer III, J. Cavanagh, P.E. Wright, M. Rance, *J. Magn. Reson.* **1991**, 93, 151-170.

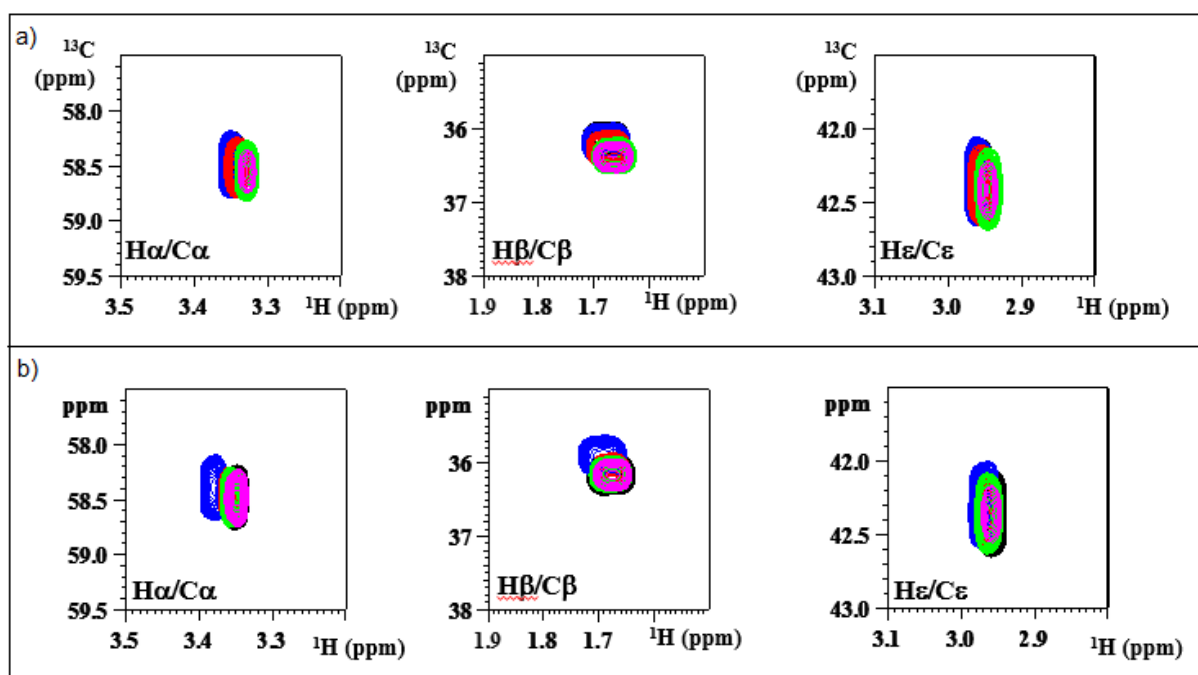

**Figure S35.**  $^{13}\text{C}$  NMR spectra for the Chemical Shift Perturbation measurements with Ru (a) and RuPt-dba (b) on the L-lysine, decreasing the concentration of lysine, at constant concentration of NPs.

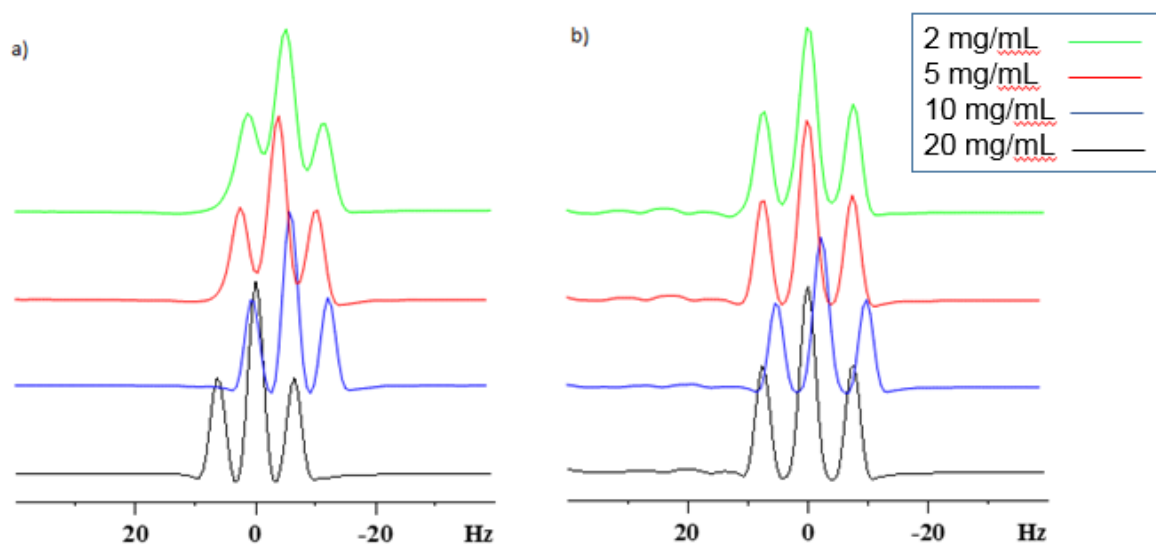

**Figure S36.** Chemical Shift Perturbation measurements in high resolution proton 1D spectra on the L-lysine ( $\text{C}\alpha$  (a) and  $\text{C}\epsilon$  (b) positions), decreasing the concentration of lysine, without NPs.
